# Supplementary material for: Synthesis of oxazolidinofullerenes/thiazolidinofullerenes: novel reaction of [60]fullerene with isocyanates/isothiocyanates promoted by ferric perchlorate
Source: Royal Society of Chemistry journal article supplement (doi:10.1039/c4ra10199e), 2014-01-01

# Electronic Supplementary Information

## Synthesis of oxazolidinofullerenes/thiazolidinofullerenes: Novel reaction [60]fullerene with isocyanates/isothiocyanates promoted by ferric perchlorate

Fa-Bao Li,<sup>\*a</sup> Ye-Fei Zhu,<sup>a</sup> Xiao-Feng Zhang,<sup>a</sup> Ji-Long Shi,<sup>a</sup> Jun Wu,<sup>a</sup> Liu Chen<sup>a</sup>

Xiao-Xue Liang<sup>a</sup> and Li Liu<sup>\*a</sup>

*Hubei Collaborative Innovation Center for Advanced Organic Chemical Materials,  
Ministry of Education Key Laboratory for the Synthesis and Application of Organic  
Functional Molecules, and School of Chemistry and Chemical Engineering, Hubei  
University, Wuhan 430062, P. R. China*

*lfb0615@gmail.com and liulihubei@gmail.com*

|                                                    |     |
|----------------------------------------------------|-----|
| Typical UV-vis spectrum of oxazolidinofullerenes   | S3  |
| Typical UV-vis spectrum of thiazolidinofullerenes  | S4  |
| Typical MALDI-TOF MS of oxazolidinofullerenes      | S5  |
| Typical MALDI-TOF MS of thiazolidinofullerenes     | S6  |
| <sup>1</sup> H NMR spectrum of compound <b>2a</b>  | S7  |
| <sup>13</sup> C NMR spectrum of compound <b>2a</b> | S8  |
| <sup>1</sup> H NMR spectrum of compound <b>2b</b>  | S9  |
| <sup>13</sup> C NMR spectrum of compound <b>2b</b> | S10 |
| <sup>1</sup> H NMR spectrum of compound <b>2c</b>  | S11 |
| <sup>13</sup> C NMR spectrum of compound <b>2c</b> | S12 |
| <sup>1</sup> H NMR spectrum of compound <b>2d</b>  | S13 |
| <sup>13</sup> C NMR spectrum of compound <b>2d</b> | S14 |
| <sup>1</sup> H NMR spectrum of compound <b>2e</b>  | S15 |
| <sup>13</sup> C NMR spectrum of compound <b>2e</b> | S16 |
| <sup>1</sup> H NMR spectrum of compound <b>2f</b>  | S17 |
| <sup>13</sup> C NMR spectrum of compound <b>2f</b> | S18 |
| <sup>1</sup> H NMR spectrum of compound <b>2g</b>  | S19 |
| <sup>13</sup> C NMR spectrum of compound <b>2g</b> | S20 |

|                                                    |     |
|----------------------------------------------------|-----|
| <sup>1</sup> H NMR spectrum of compound <b>3</b>   | S21 |
| <sup>1</sup> H NMR spectrum of compound <b>5a</b>  | S22 |
| <sup>13</sup> C NMR spectrum of compound <b>5a</b> | S23 |
| <sup>1</sup> H NMR spectrum of compound <b>5b</b>  | S24 |
| <sup>13</sup> C NMR spectrum of compound <b>5b</b> | S25 |
| <sup>1</sup> H NMR spectrum of compound <b>5c</b>  | S26 |
| <sup>13</sup> C NMR spectrum of compound <b>5c</b> | S27 |
| <sup>1</sup> H NMR spectrum of compound <b>5d</b>  | S28 |
| <sup>13</sup> C NMR spectrum of compound <b>5d</b> | S29 |
| <sup>1</sup> H NMR spectrum of compound <b>5e</b>  | S30 |
| <sup>13</sup> C NMR spectrum of compound <b>5e</b> | S31 |
| <sup>1</sup> H NMR spectrum of compound <b>5f</b>  | S32 |
| <sup>13</sup> C NMR spectrum of compound <b>5f</b> | S33 |
| <sup>1</sup> H NMR spectrum of compound <b>5g</b>  | S34 |
| <sup>13</sup> C NMR spectrum of compound <b>5g</b> | S35 |
| <sup>1</sup> H NMR spectrum of compound <b>5h</b>  | S36 |
| <sup>13</sup> C NMR spectrum of compound <b>5h</b> | S37 |

UV-vis Spectrum of compound **2b** in  $\text{CHCl}_3$

Chemical structure of compound **2b** is shown as an inset. It features a C<sub>60</sub> fullerene cage substituted with a 4-methylphenyl group via a five-membered cyclic carbonate bridge.

| Wavelength (nm) | Absorption |
|-----------------|------------|
| 300             | 0.00       |
| 315             | 0.85       |
| 350             | 0.30       |
| 400             | 0.05       |
| 500             | 0.02       |
| 600             | 0.01       |
| 700             | 0.01       |
| 800             | 0.01       |

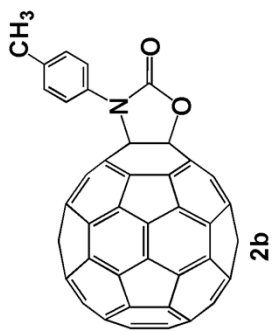

UV-vis spectrum of compound **5f** in  $\text{CHCl}_3$

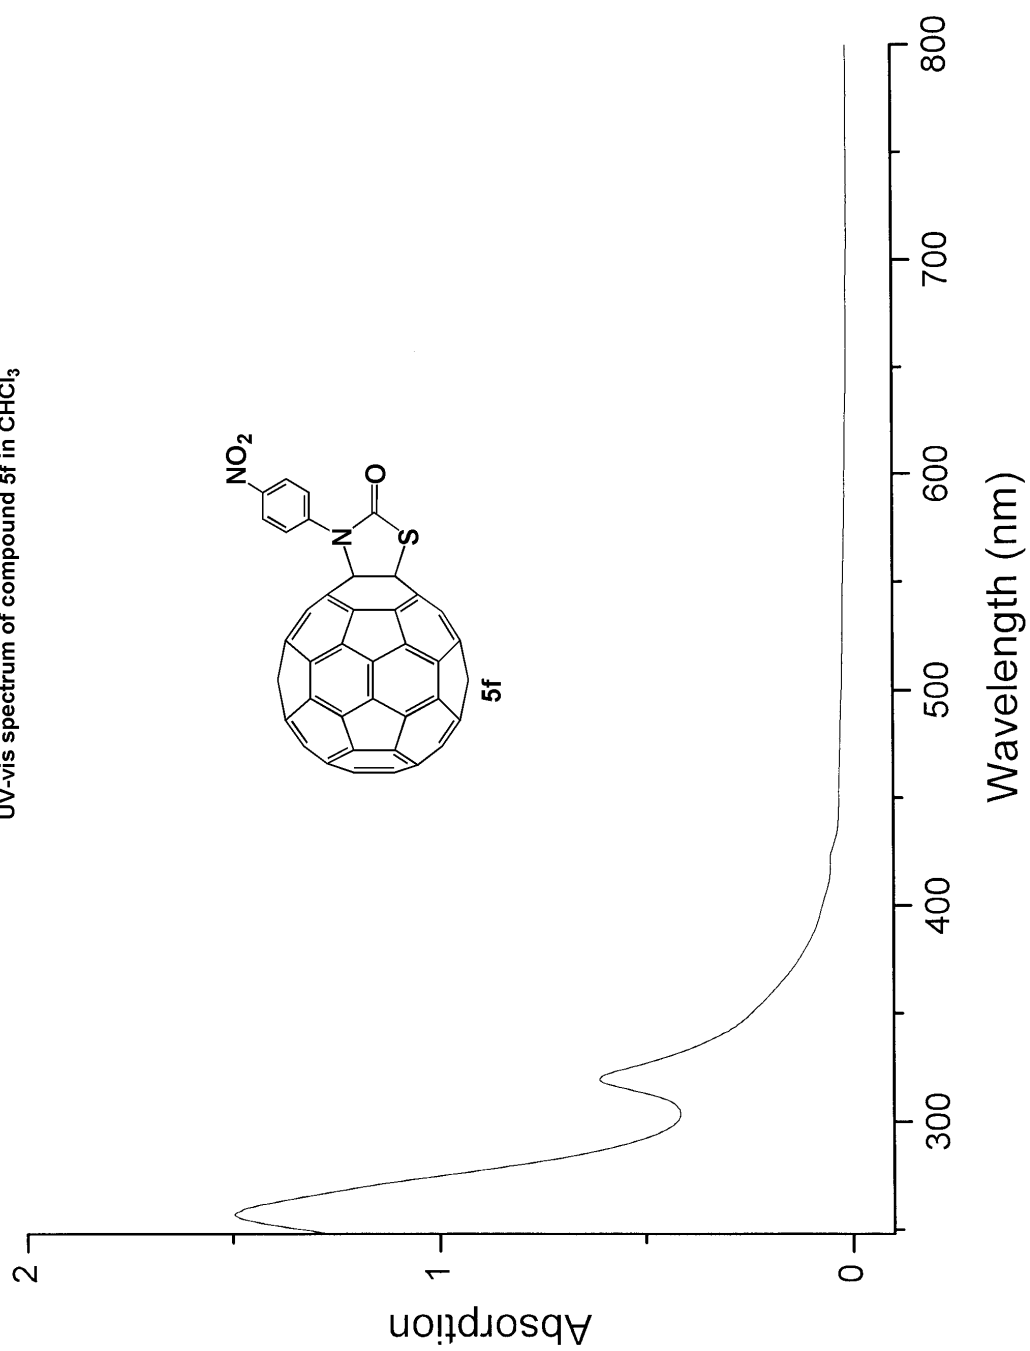

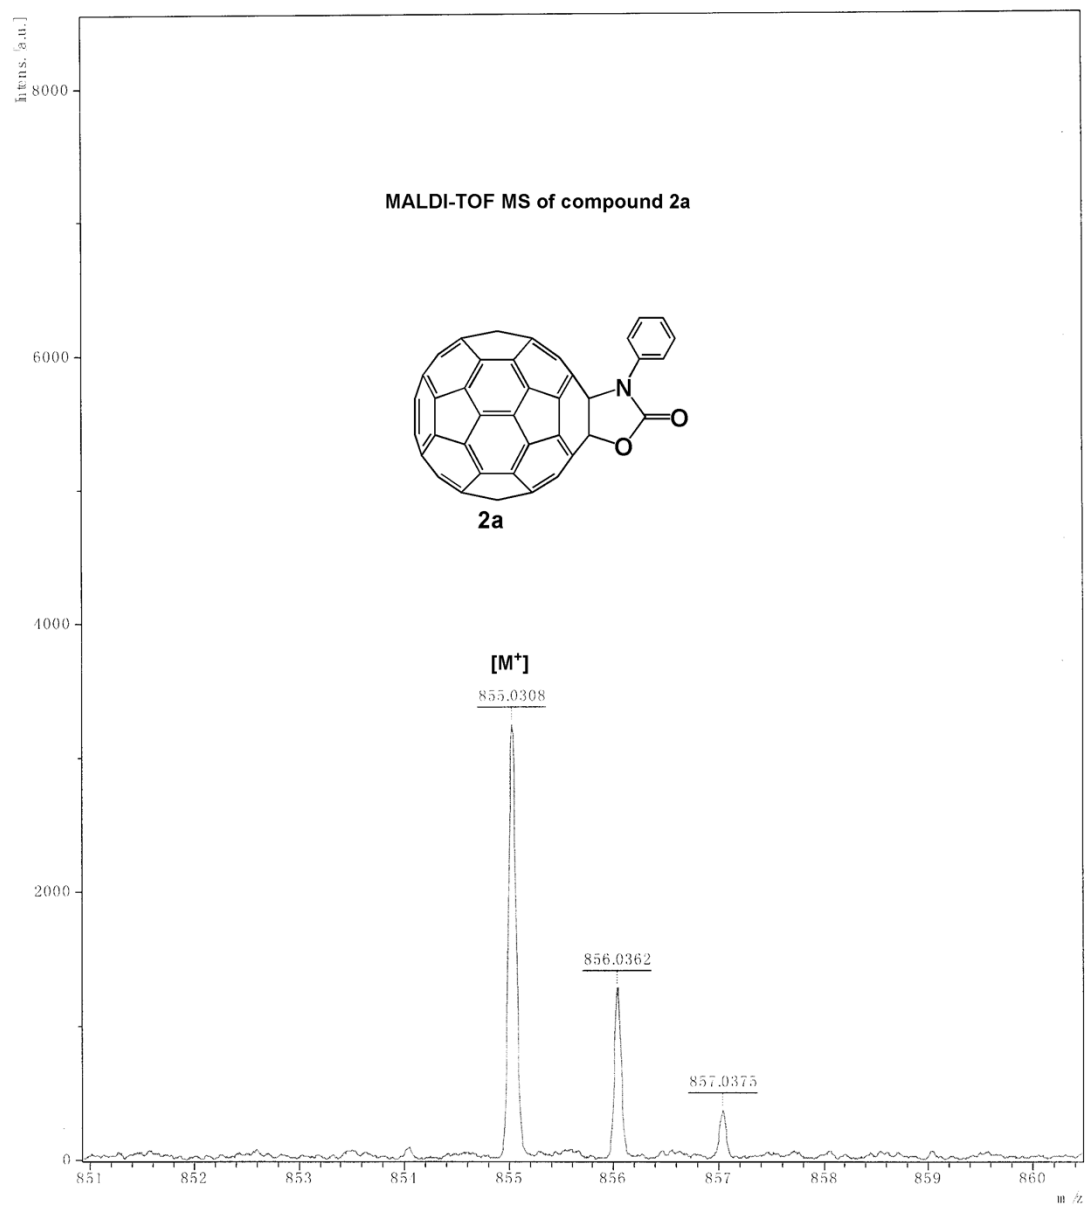

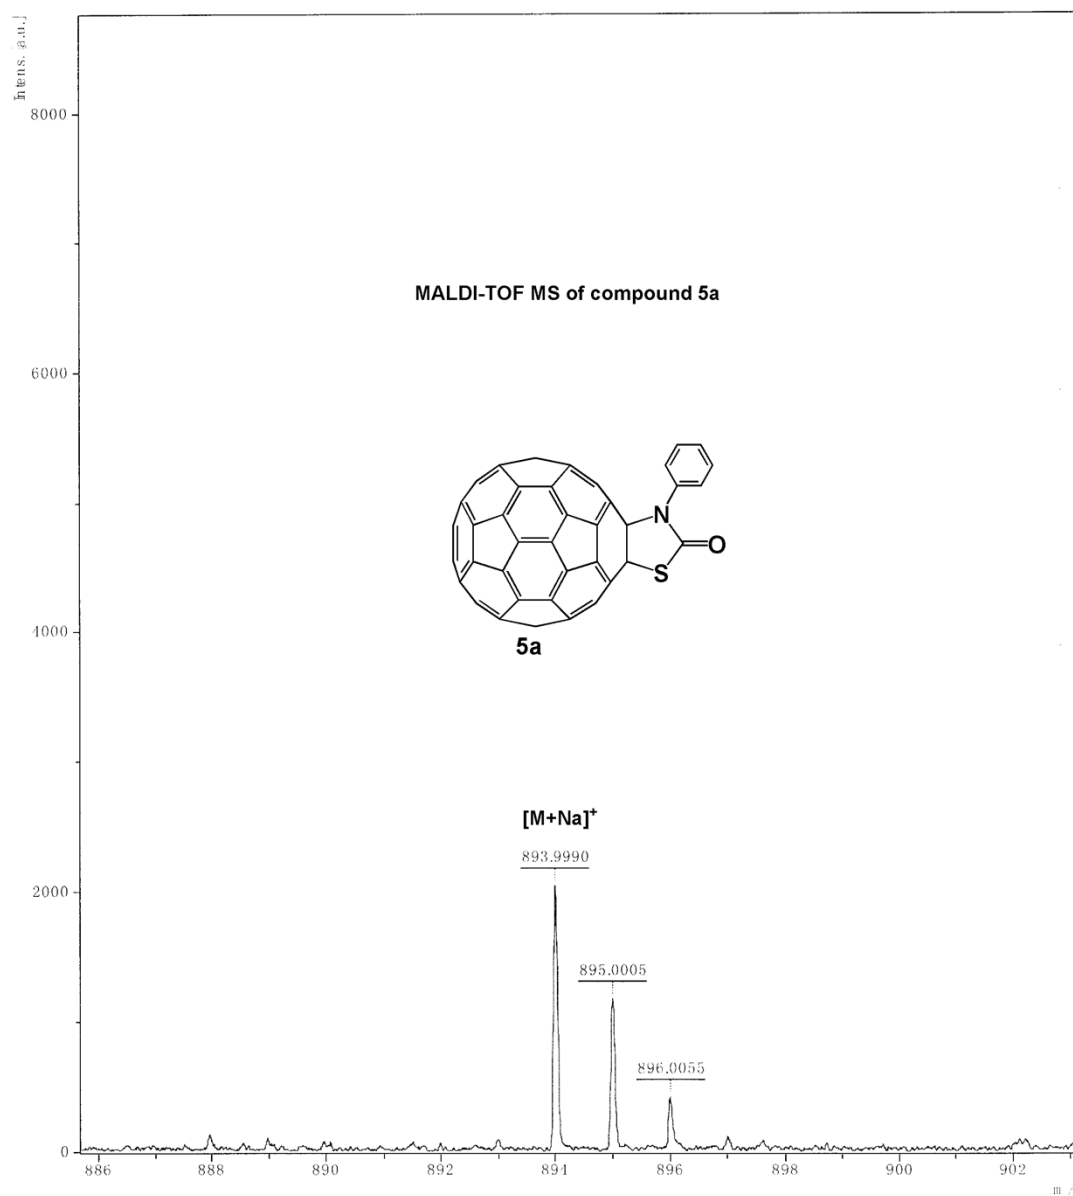

<sup>1</sup>H NMR (600 MHz, CS<sub>2</sub>/DMSO-*d*<sub>6</sub>) of compound 2a

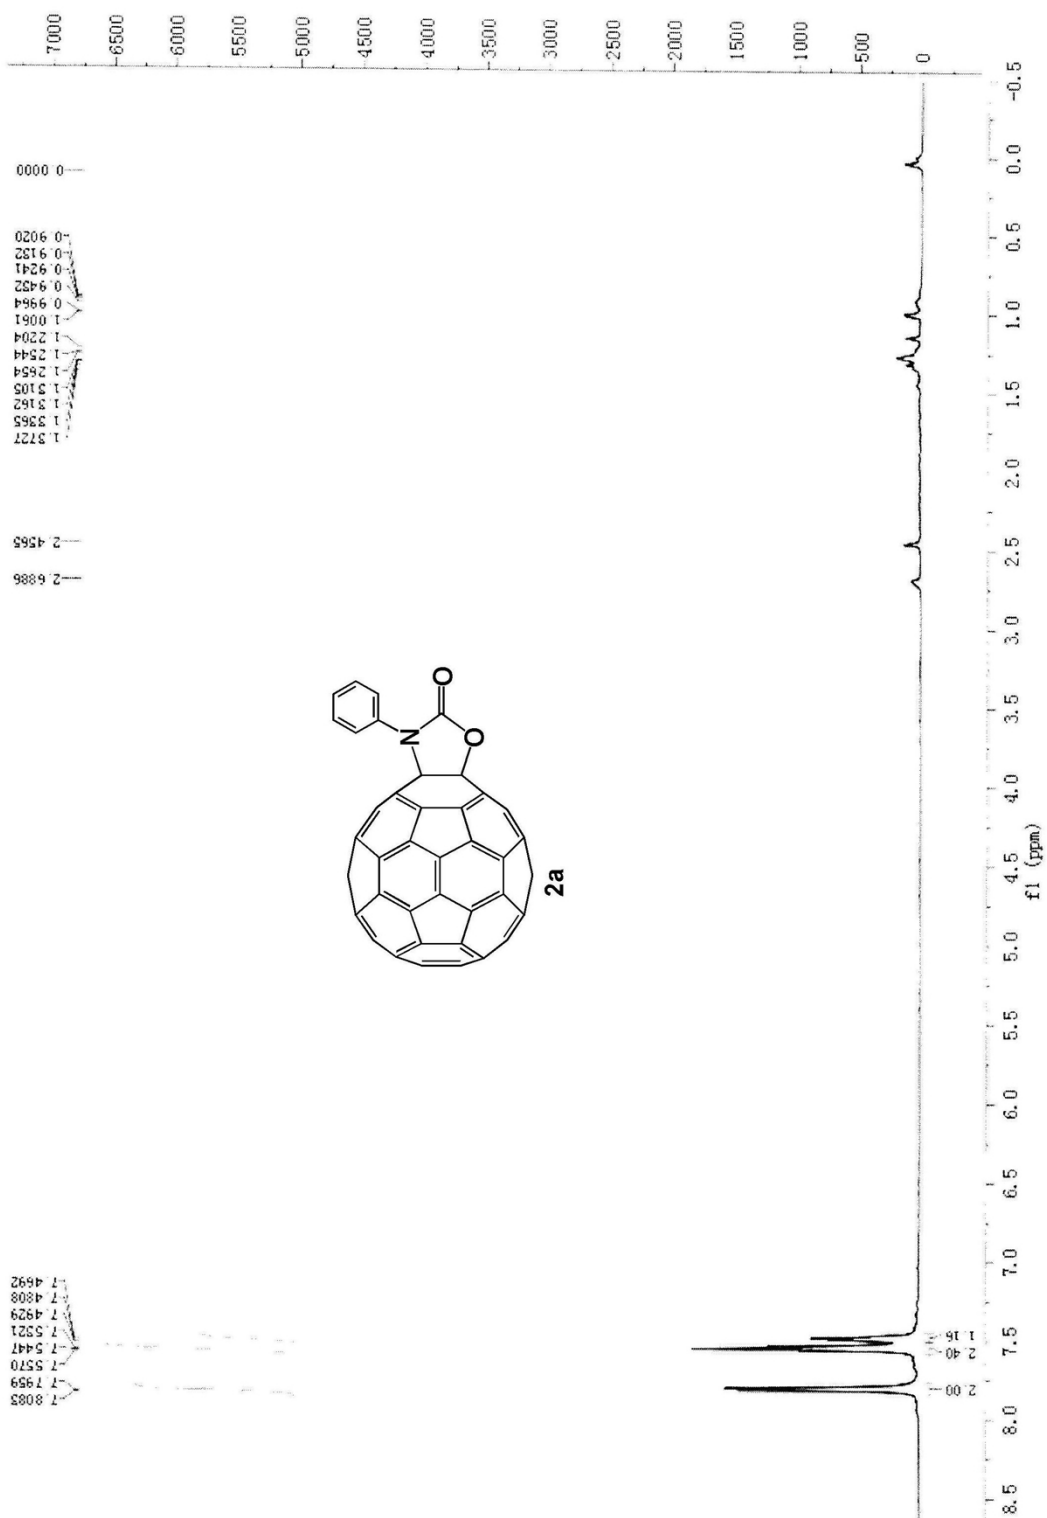

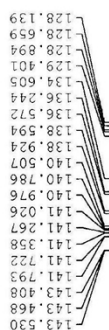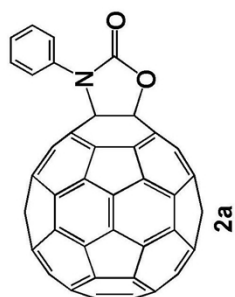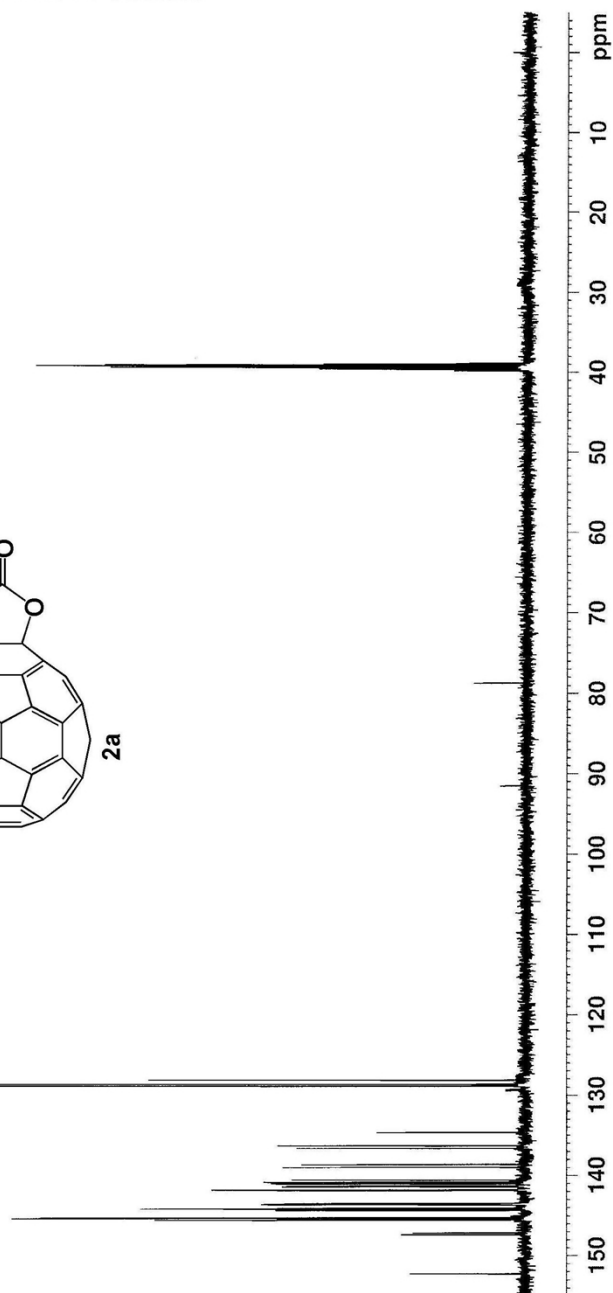[illegible]







<sup>1</sup>H NMR (600 MHz, CS<sub>2</sub>/DMSO-*d*<sub>6</sub>) of compound 2c

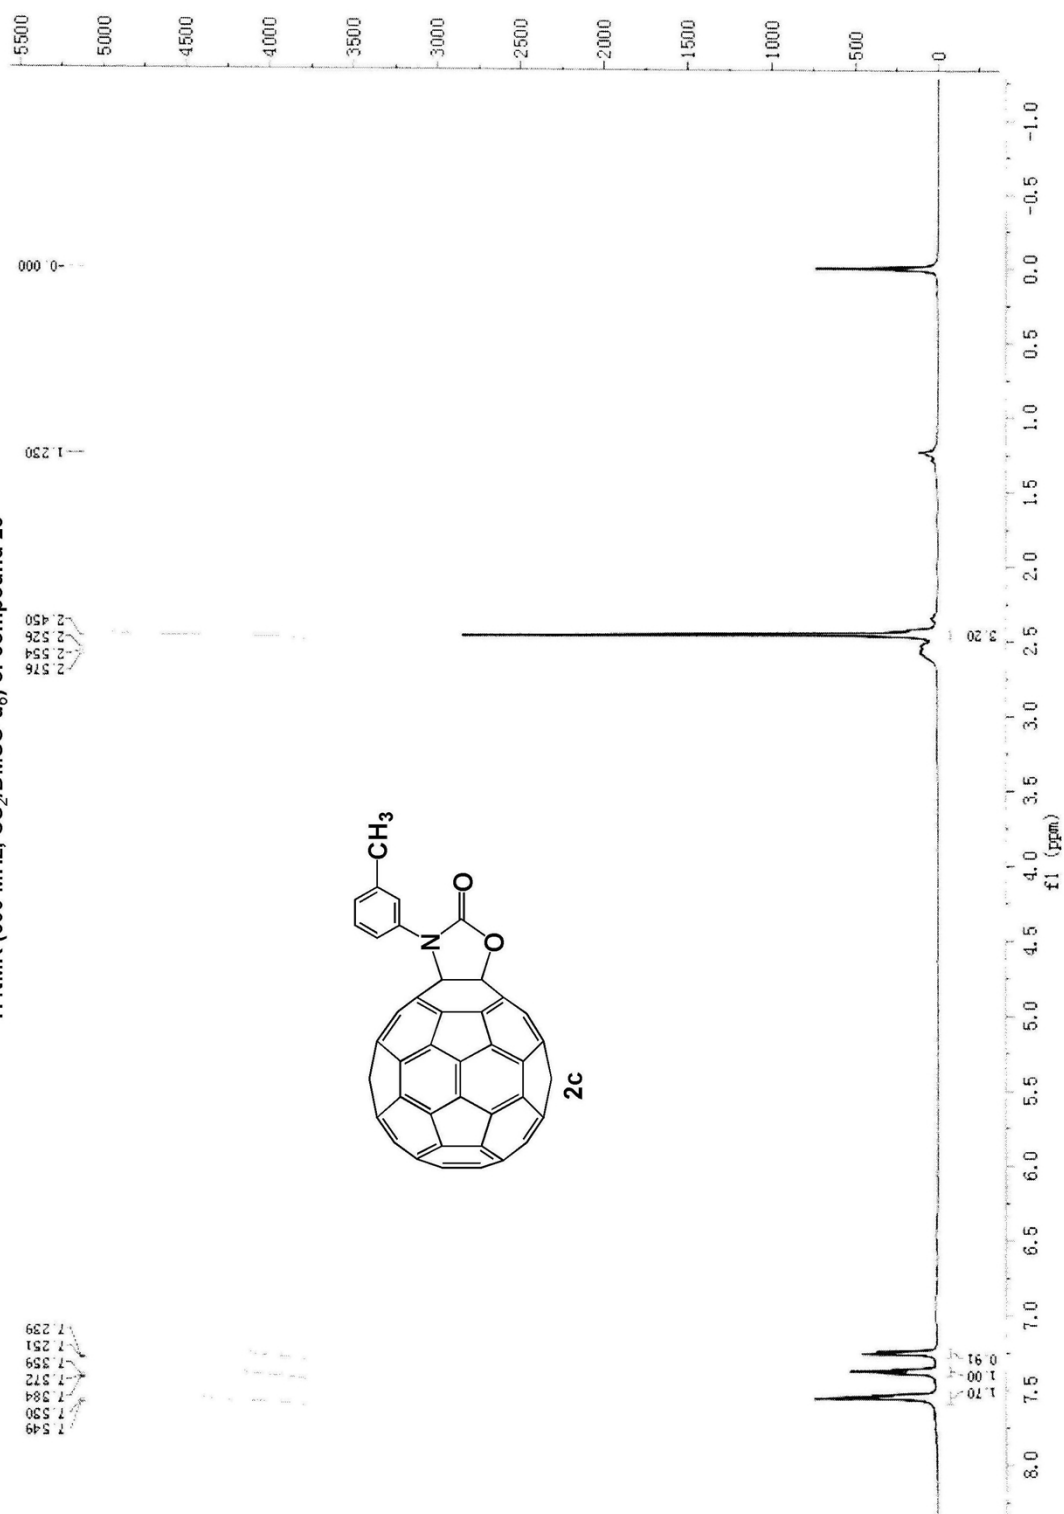



<sup>1</sup>H NMR (500 MHz, CS<sub>2</sub>/CDCl<sub>3</sub>) of compound 2d

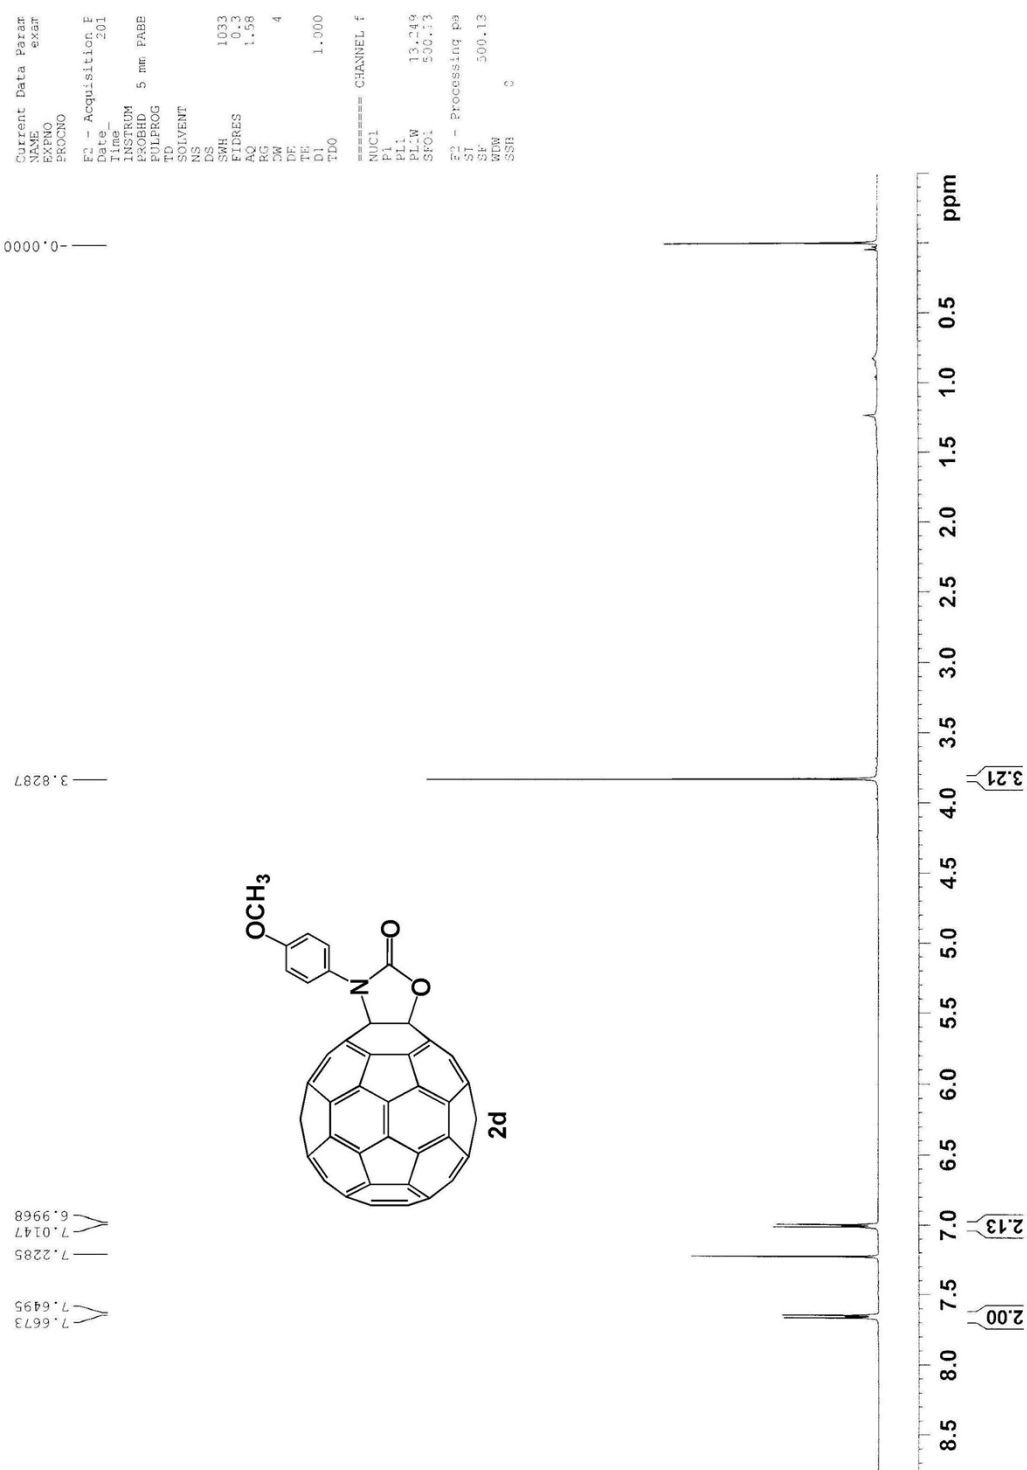

<sup>13</sup>C NMR (125 MHz, CS<sub>2</sub>/CDCl<sub>3</sub>) of compound 2d

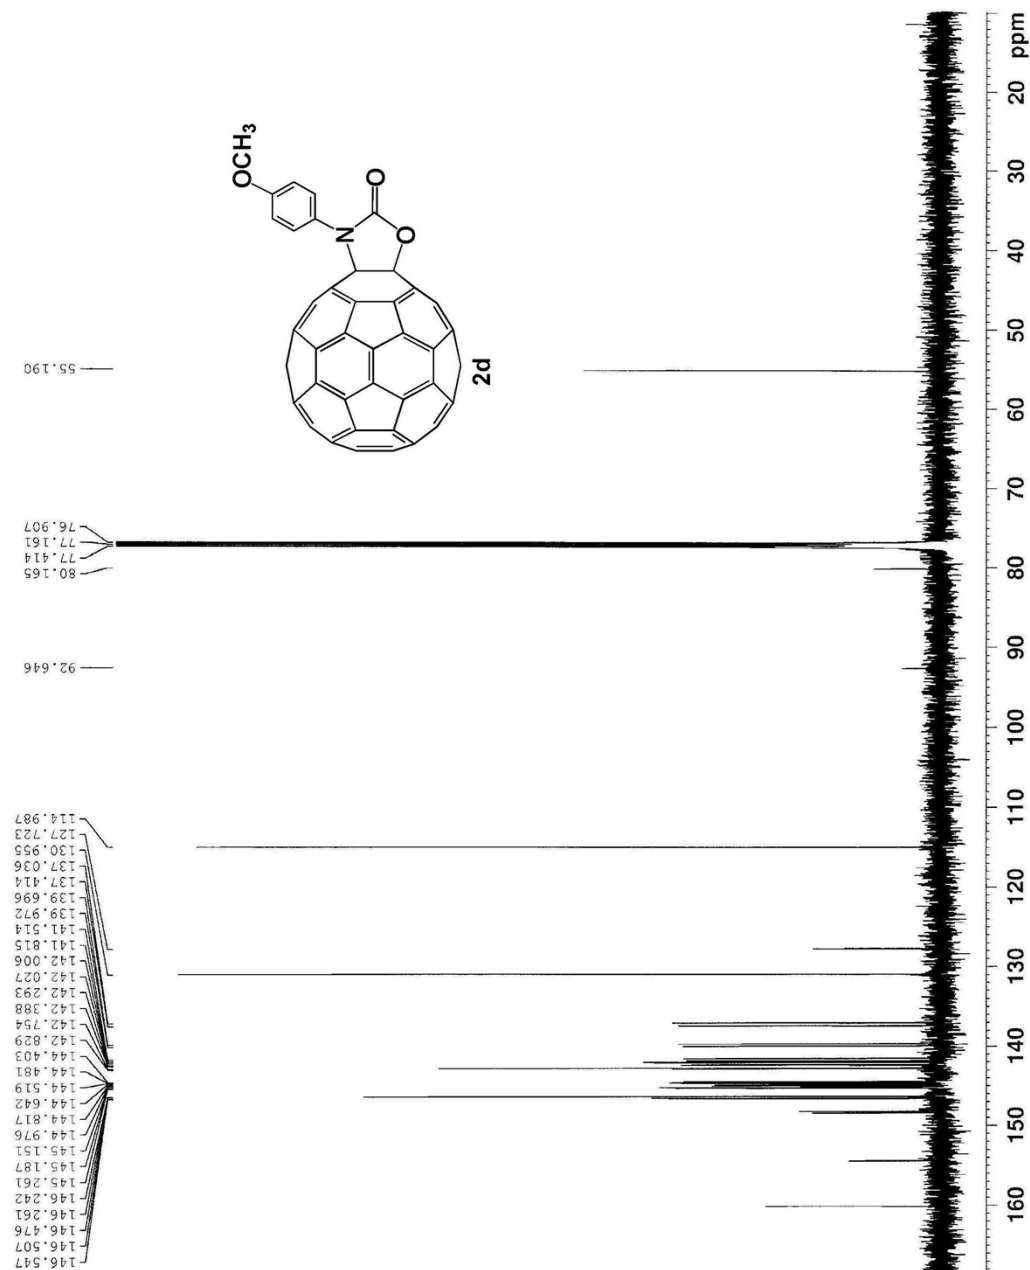

<sup>1</sup>H NMR (600 MHz, CS<sub>2</sub>/CDCl<sub>3</sub>) of compound **2e**

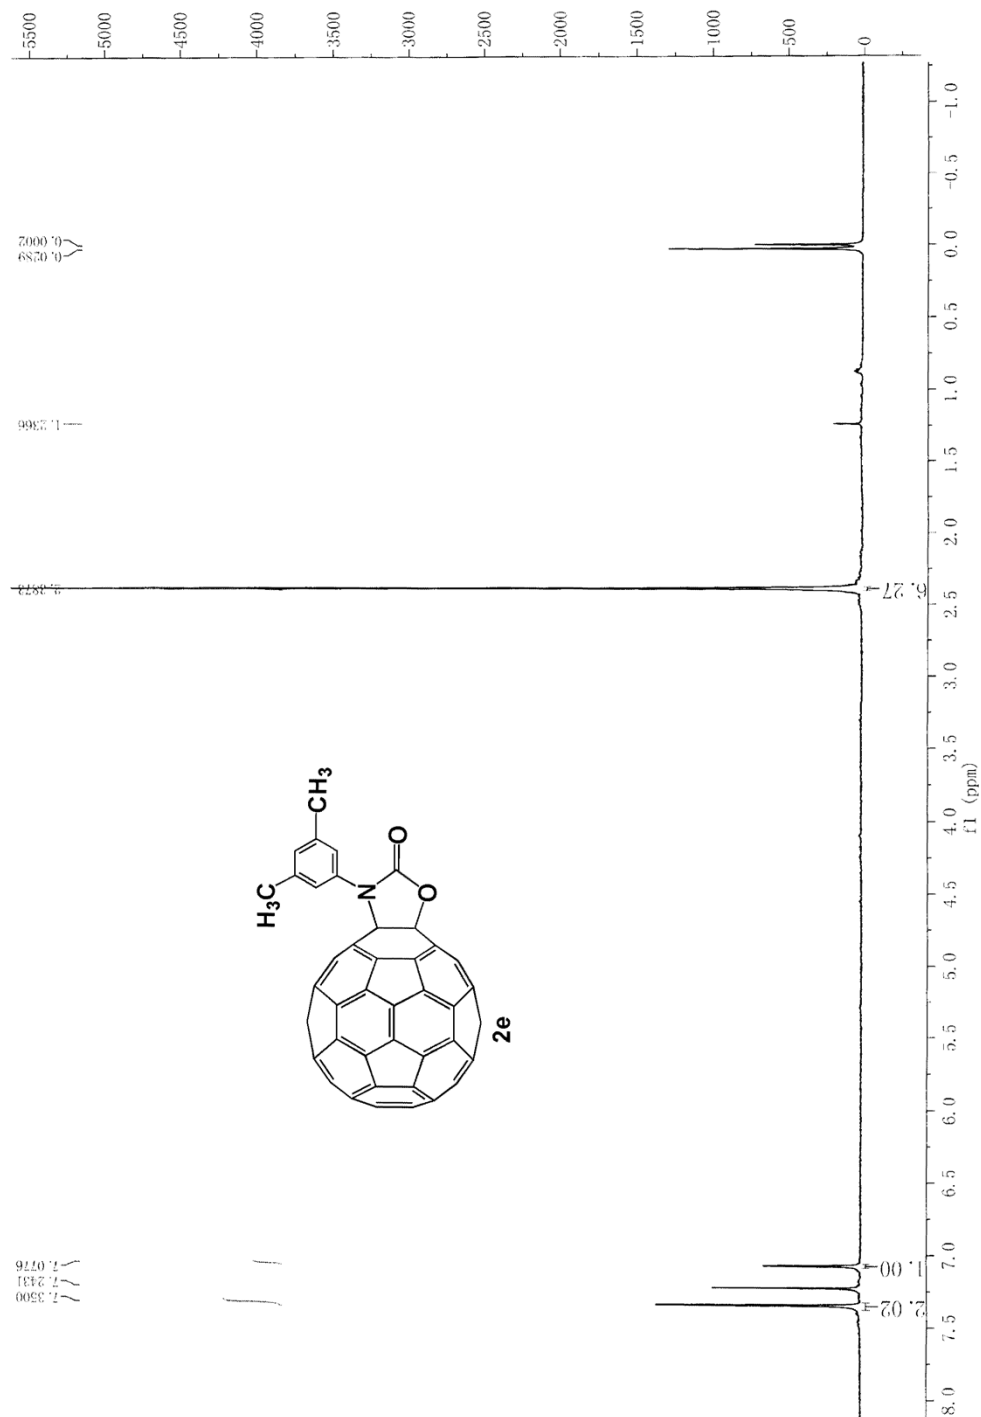

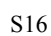



<sup>1</sup>H NMR (600 MHz, CS<sub>2</sub>/DMSO-*d*<sub>6</sub>) of compound **2f**

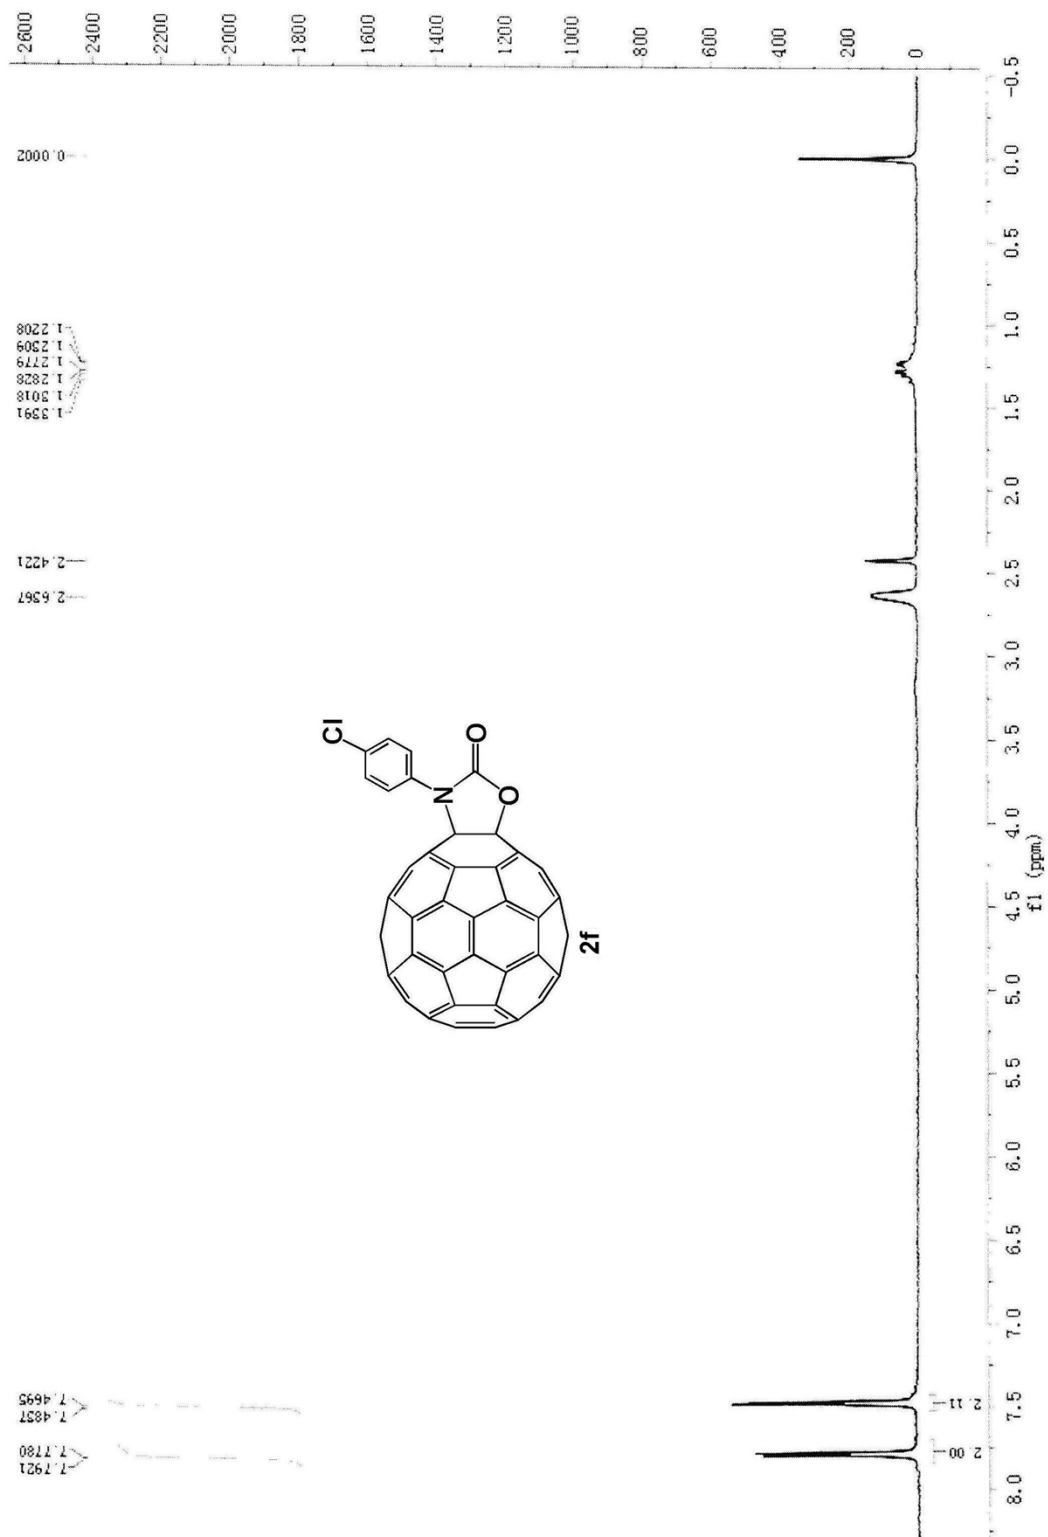

The figure displays a mass spectrum (top) and the chemical structure of the compound (bottom). The mass spectrum shows relative intensity on the y-axis (0 to 100) versus mass-to-charge ratio (m/z) on the x-axis (40 to 260). The base peak is at m/z 141. Other significant peaks are labeled at m/z 43, 55, 67, 79, 91, 103, 115, 127, 139, 151, 163, 175, 187, 199, 211, 223, 235, 247, 259, and 271.

The chemical structure is a polycyclic aromatic hydrocarbon (PAH) with a chlorine substituent. It features a large, fused ring system (phenanthrene-like) with a five-membered ring fused to it, containing a nitrogen atom and a carbonyl group. A chlorine atom is attached to the nitrogen atom. The structure is labeled with 'Cl' and 'O'.

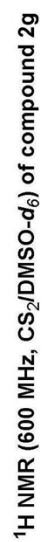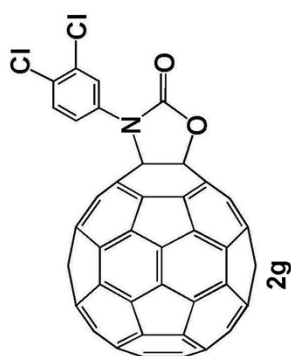

<sup>13</sup>C NMR (125 MHz, CS<sub>2</sub>/CDCl<sub>3</sub>) of compound 2g

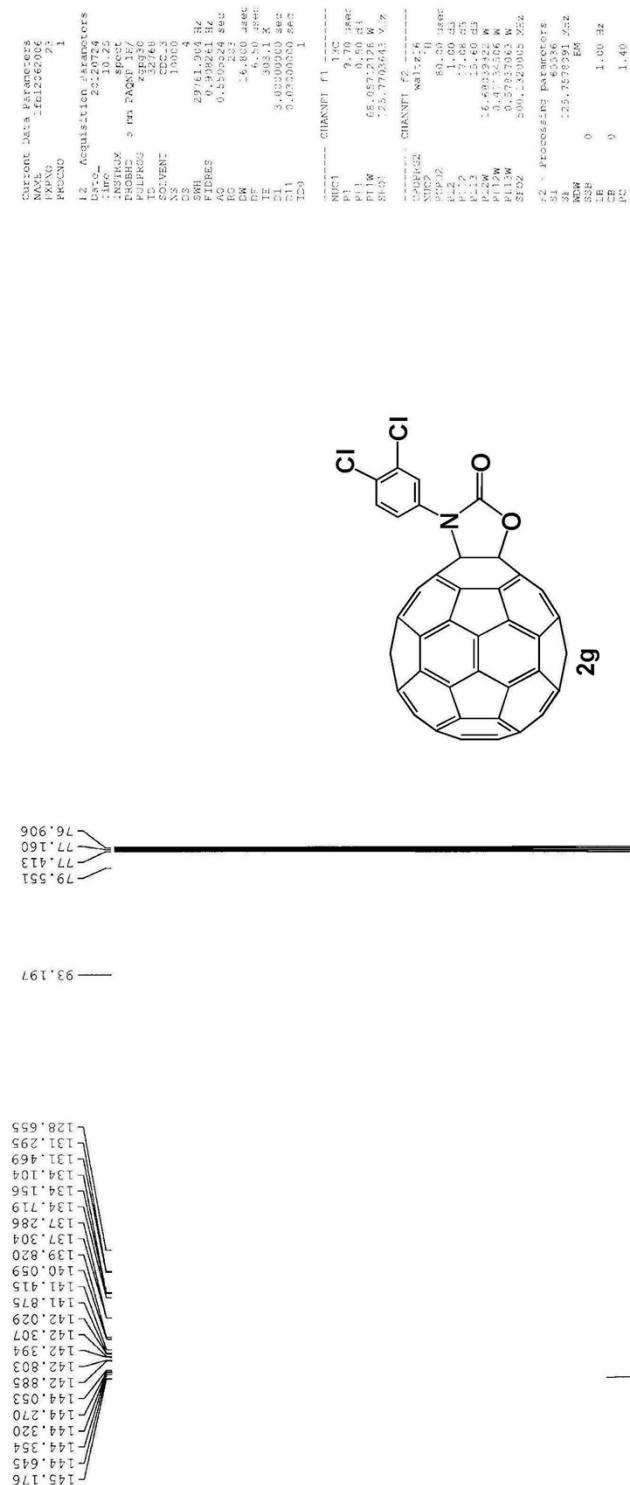

<sup>1</sup>H NMR (600 MHz, CS<sub>2</sub>/CDCl<sub>3</sub>) of compound **3**

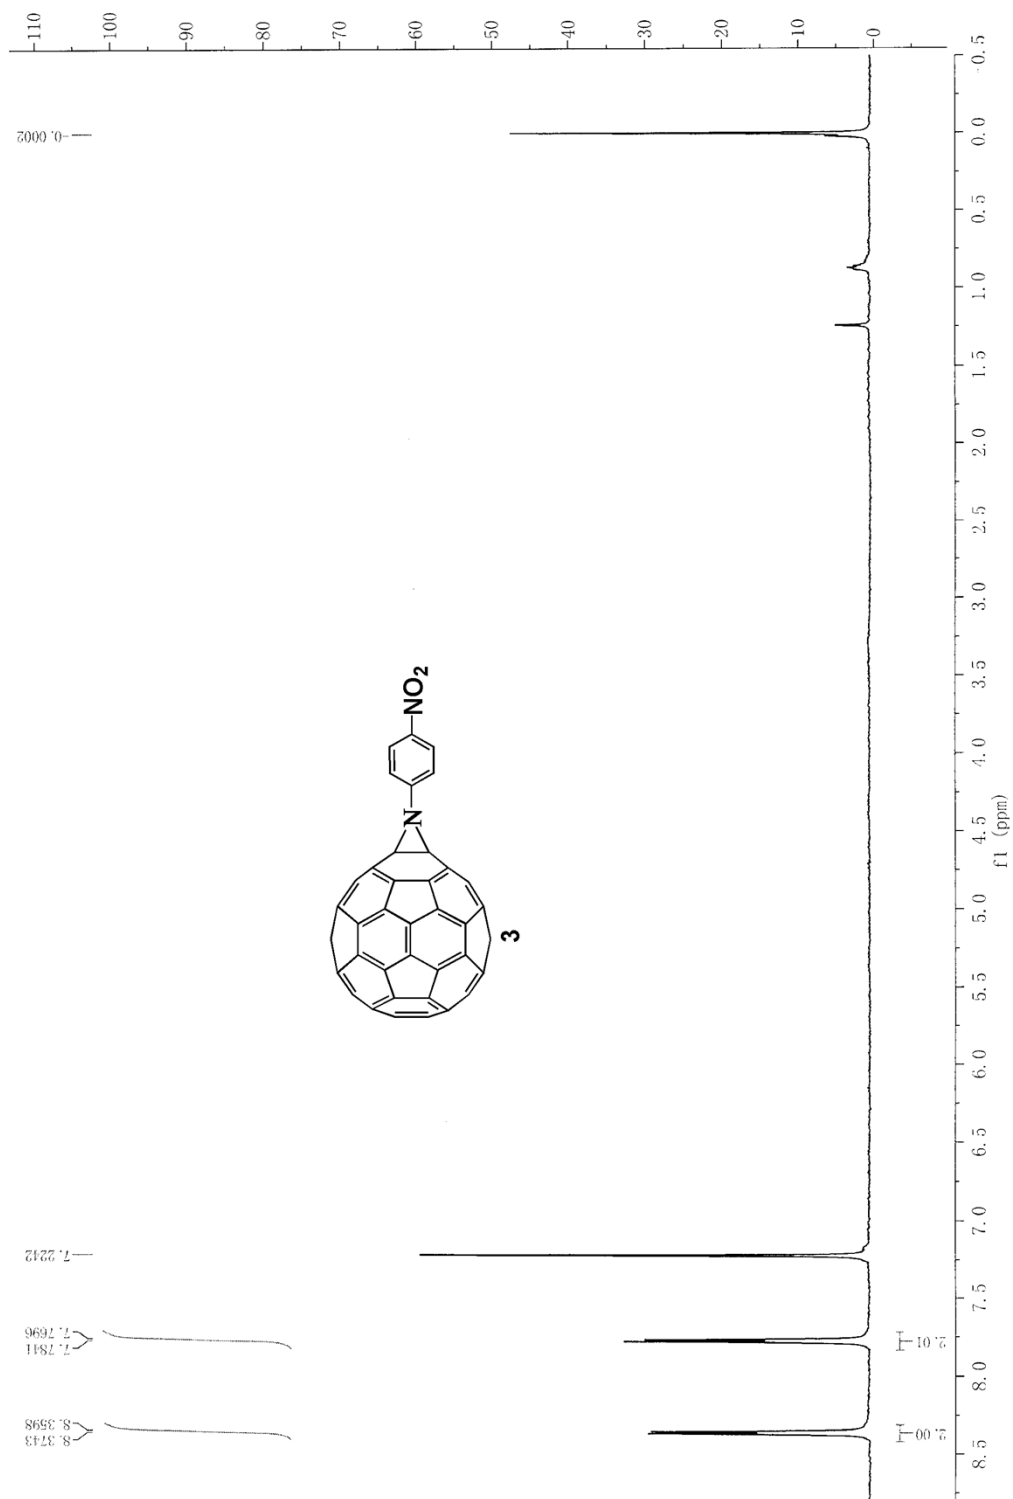

<sup>1</sup>H NMR (500 MHz, CS<sub>2</sub>/CDCl<sub>3</sub>) of compound 5a

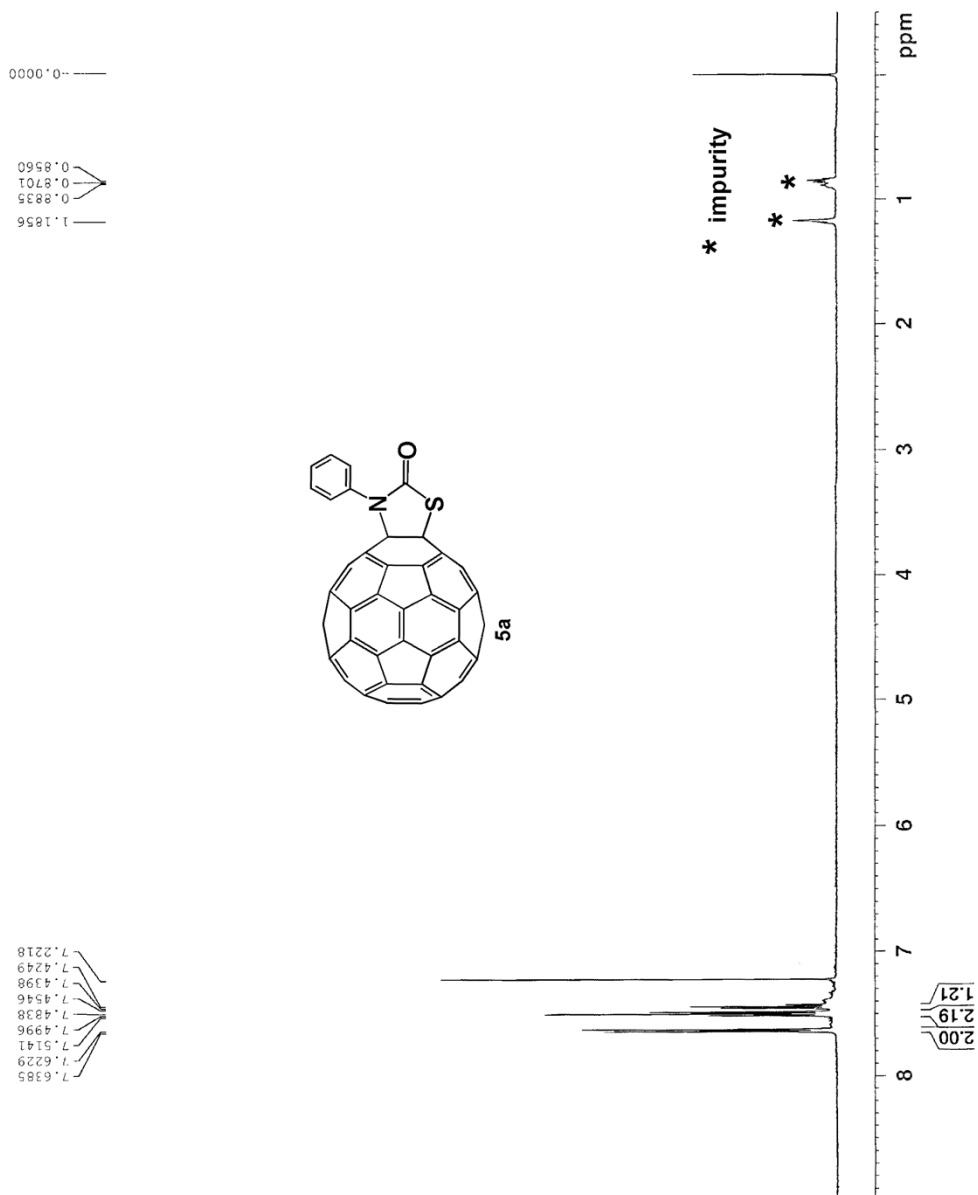

<sup>13</sup>C NMR (125 MHz, CS<sub>2</sub>/CDCl<sub>3</sub>) of compound 5a

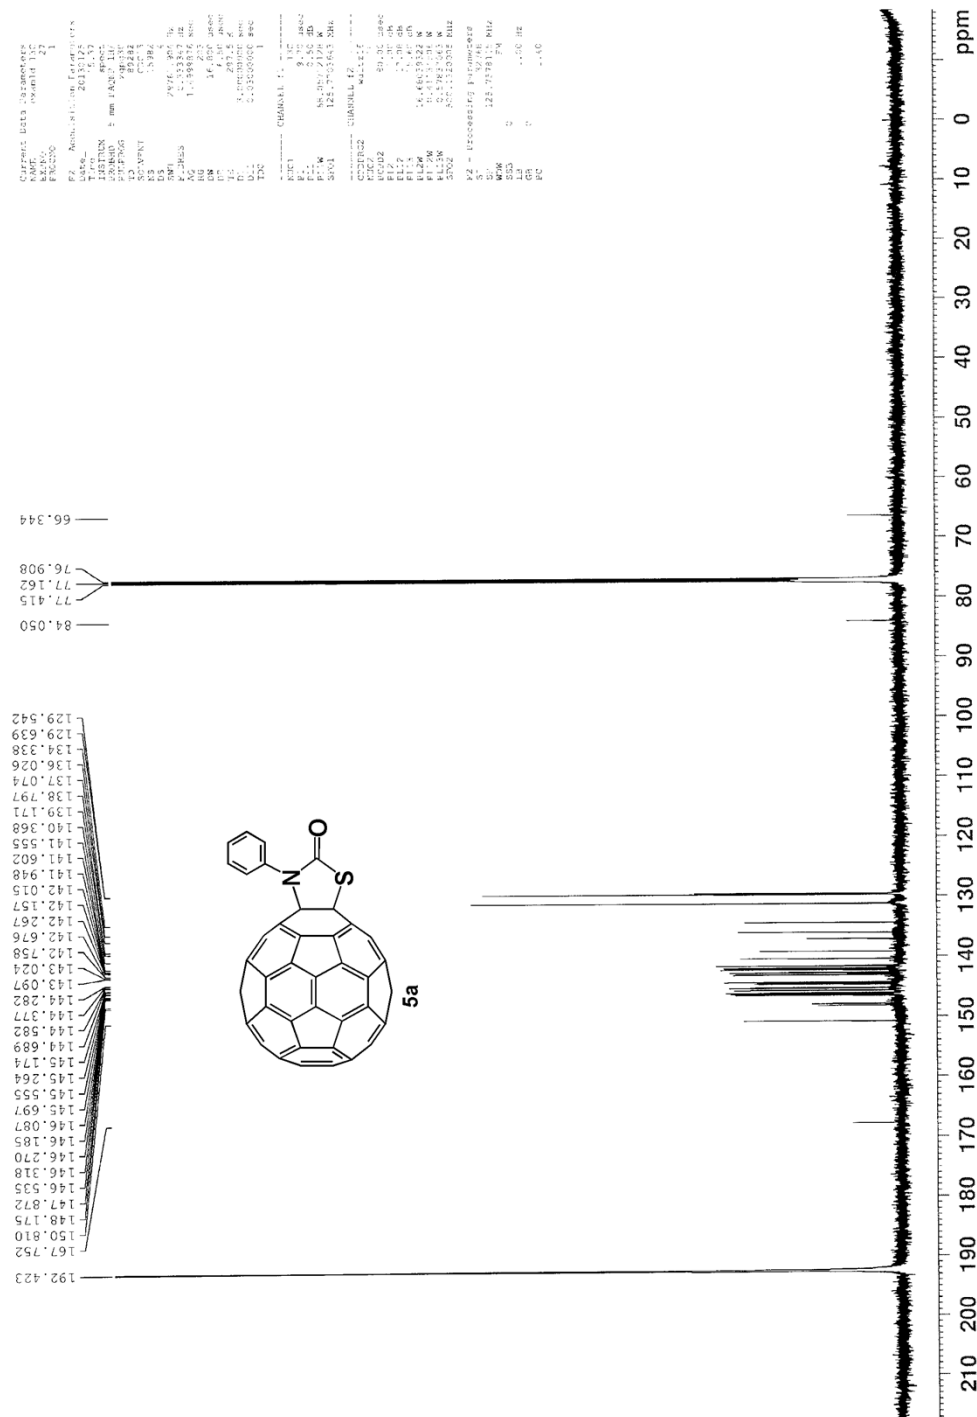

<sup>1</sup>H NMR (500 MHz, CS<sub>2</sub>/CDCl<sub>3</sub>) of compound 5b

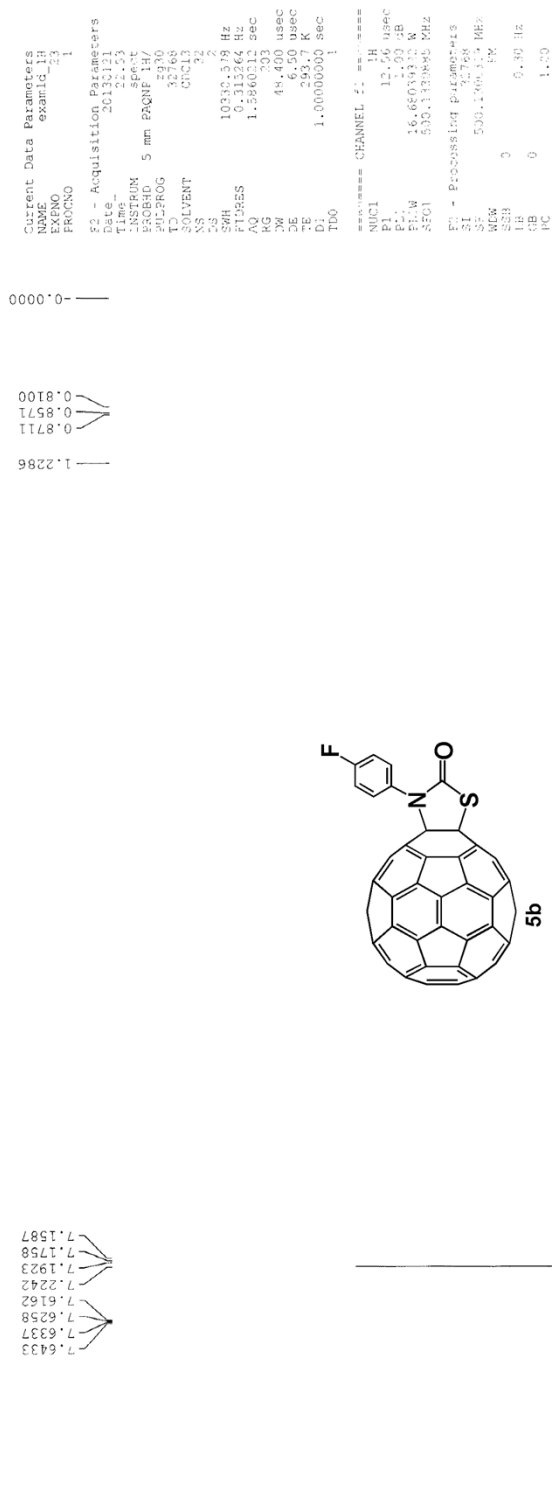



**<sup>13</sup>C NMR (125 MHz, CS<sub>2</sub>/CDCl<sub>3</sub>) of compound 5b**

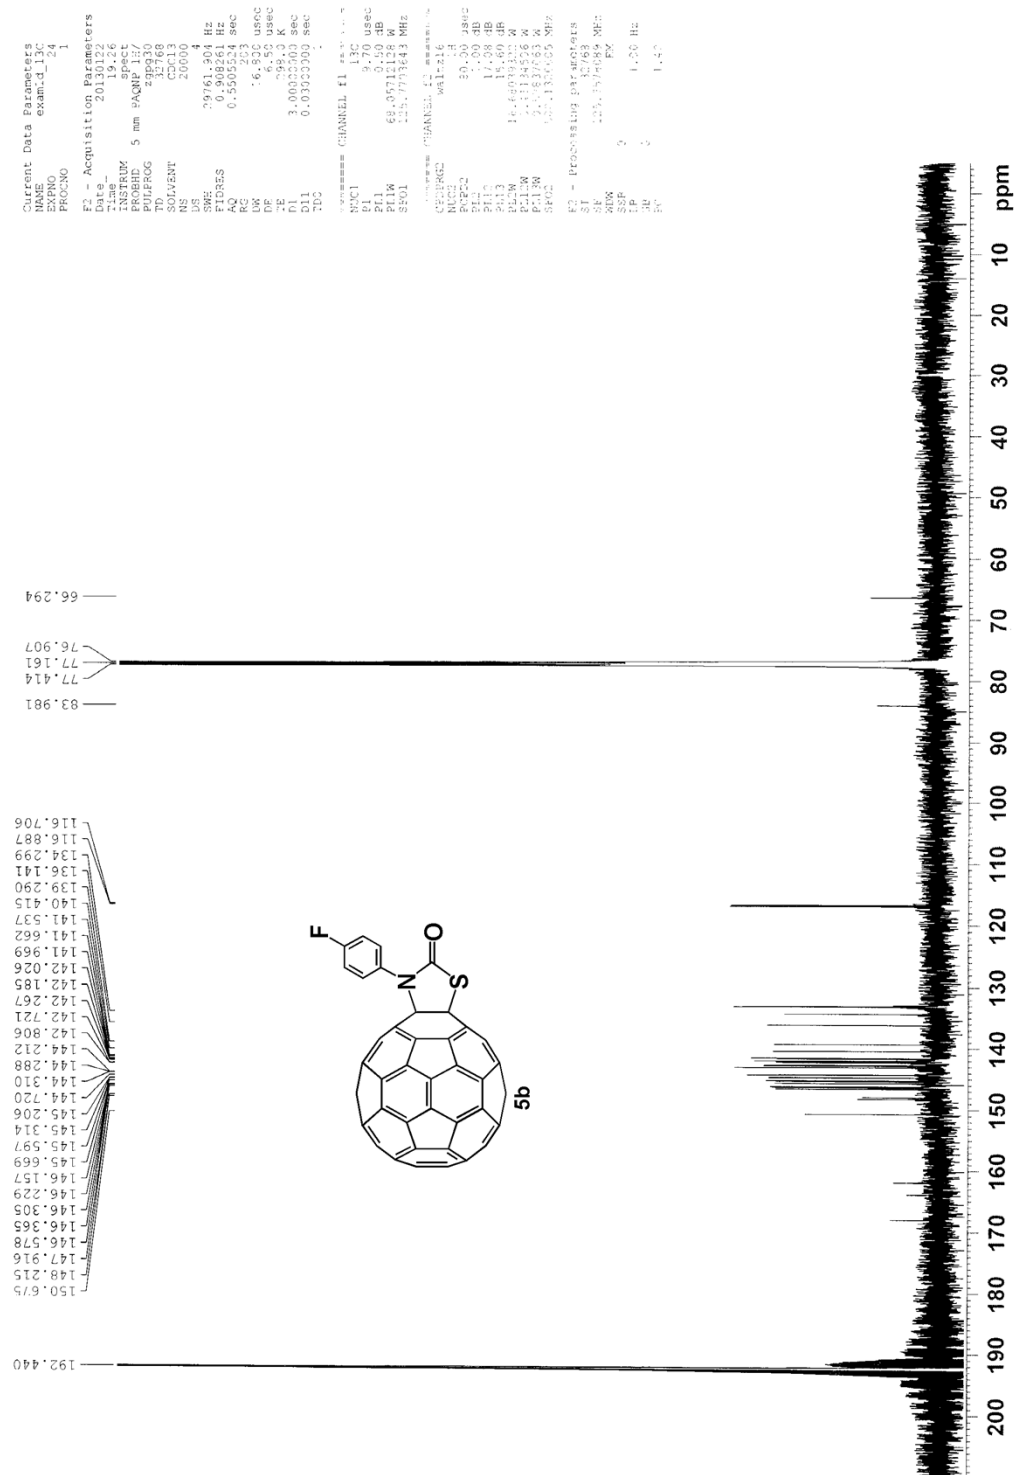

<sup>1</sup>H NMR (500 MHz, CS<sub>2</sub>/CDCl<sub>3</sub>) of compound 5c

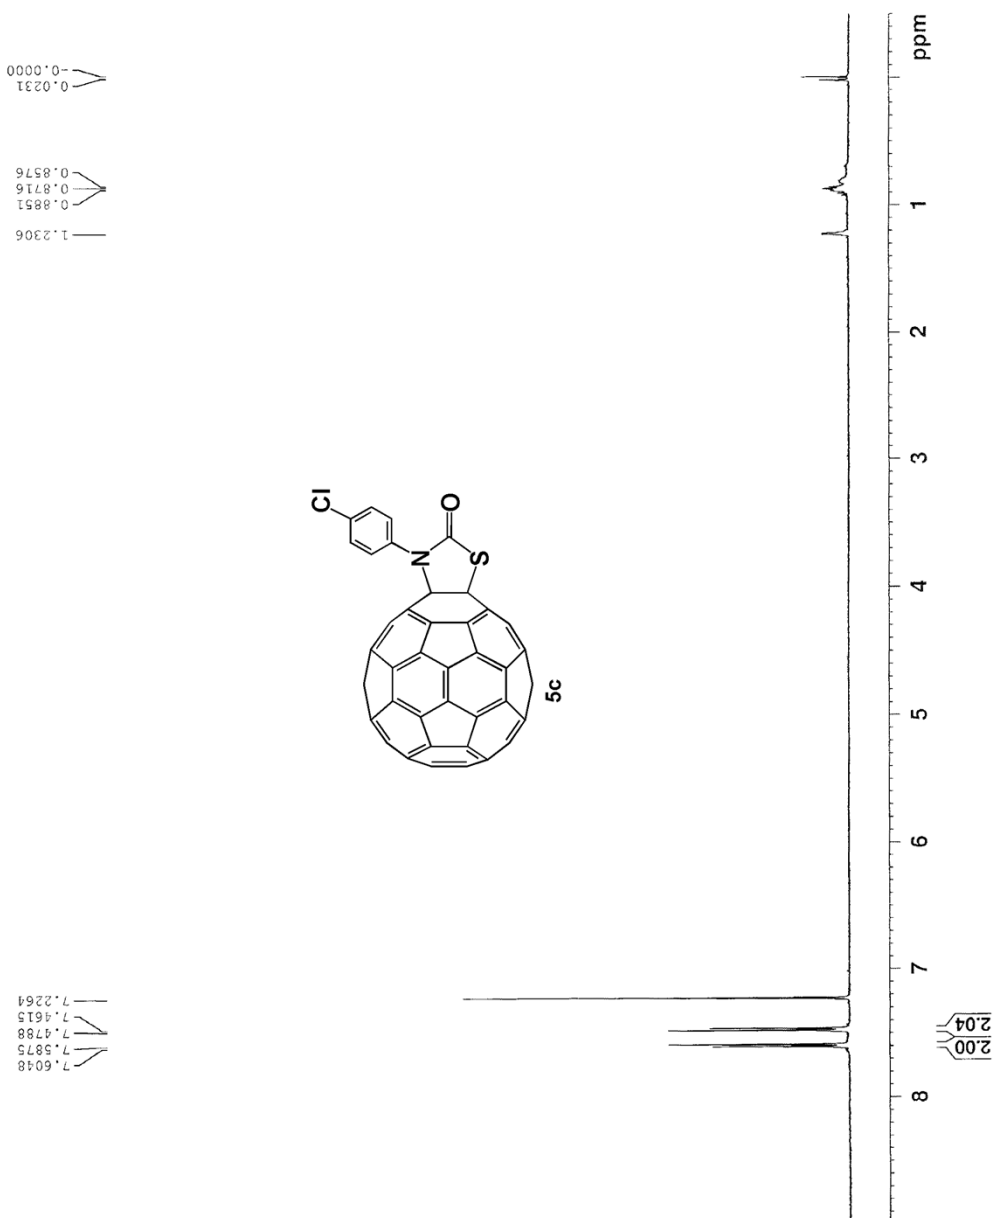

Current Data Parameters  
NAME: 5c  
EXPNO: 2  
PROCNO: 1  
F2: Acquisition Parameters  
Date\_0: 2012.02.21  
Time: 23.02  
INSTRUM: spect  
PROBHD: 5 mm QNP 1H/13  
PULPROG: zgpg30  
TD: 32768  
SOLVENT: CDCl3  
NS: 512  
DS: 4  
SWH: 16305.574 Hz  
FIDRES: 0.000264 Hz  
AQ: 0.056212 s  
RG: 203  
CW: 48.400 Hz  
ZG: 0.000000 Hz  
PC: 1.00  
SFO: 500.136055 MHz  
D0: 0.000000 s

===== CHANNEL f2 =====  
NUC1: 13C  
P1: 12.00 u  
PL1: -2.00 dB  
NUC2: 1H  
P2: 12.00 u  
PL2: -2.00 dB  
PL12: 19.00 dB  
SFO1: 125.7613507 MHz  
SFO2: 500.136055 MHz  
F2: Processing parameters  
SI: 32768  
SF: 500.136055 MHz  
WDW: EM  
SSB: 0  
GB: 0  
PC: 1.00

<sup>13</sup>C NMR (125 MHz, CS<sub>2</sub>/CDCl<sub>3</sub>) of compound 5c

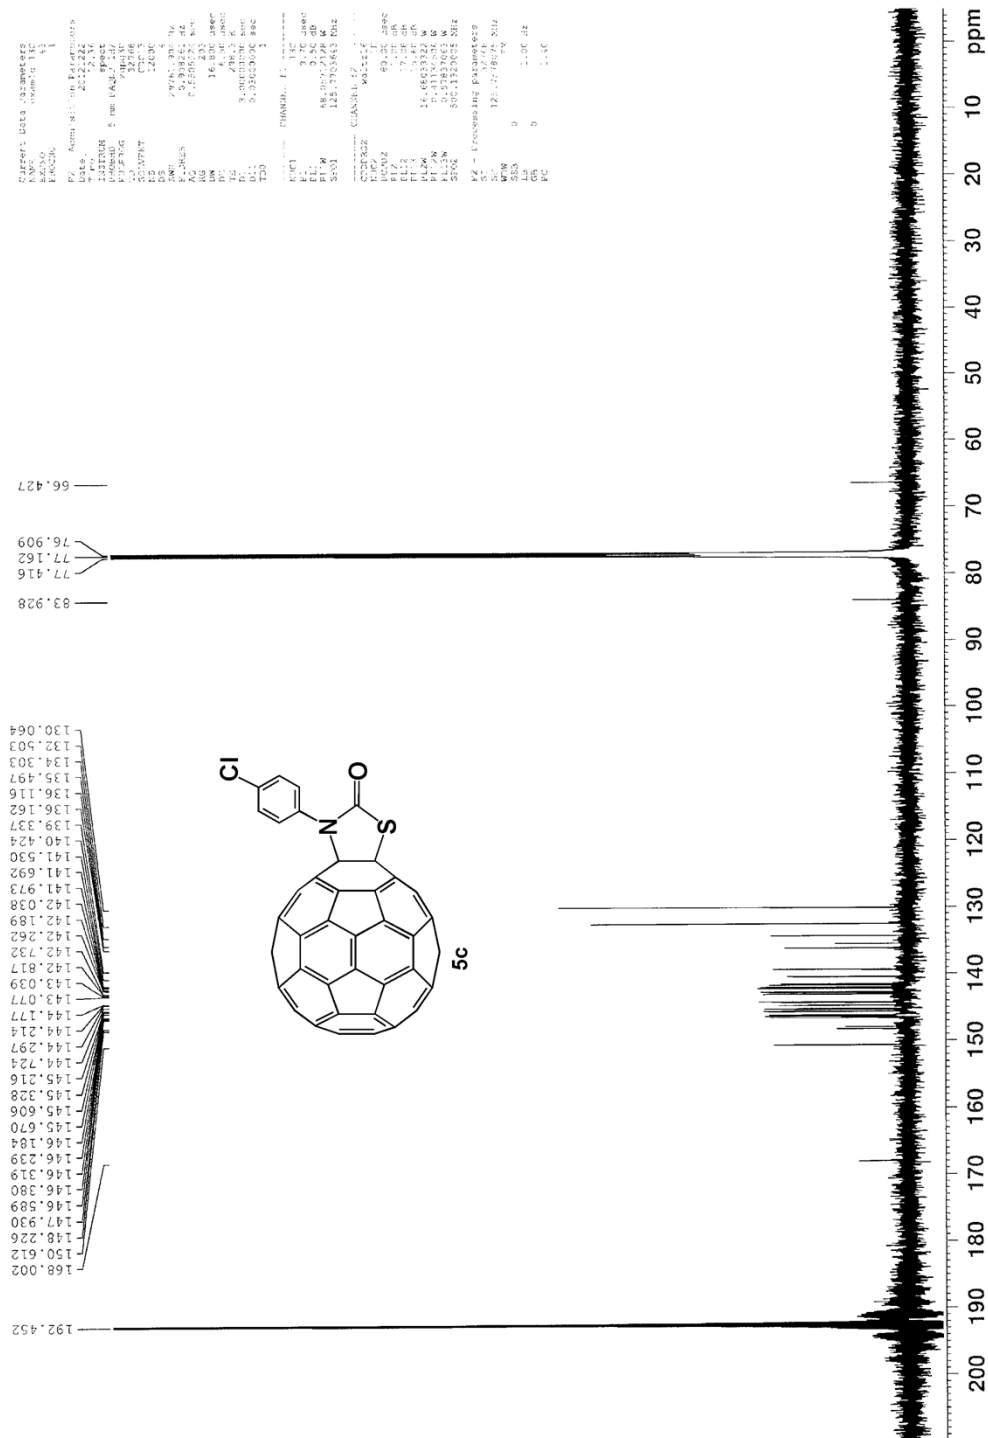

<sup>1</sup>H NMR (600 MHz, CS<sub>2</sub>/DMSO-*d*<sub>6</sub>) of compound **5d**

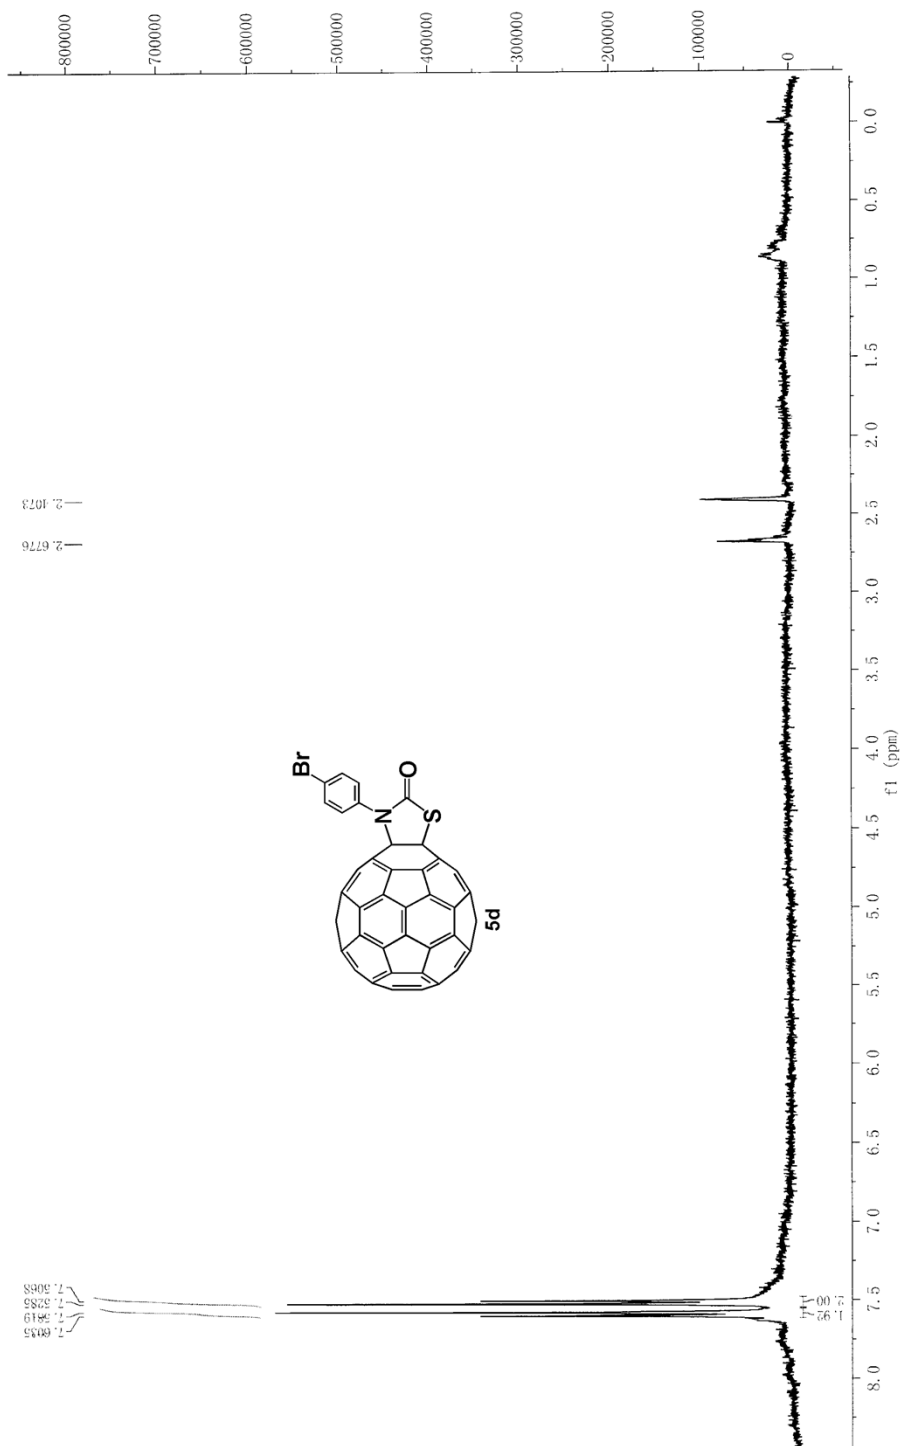

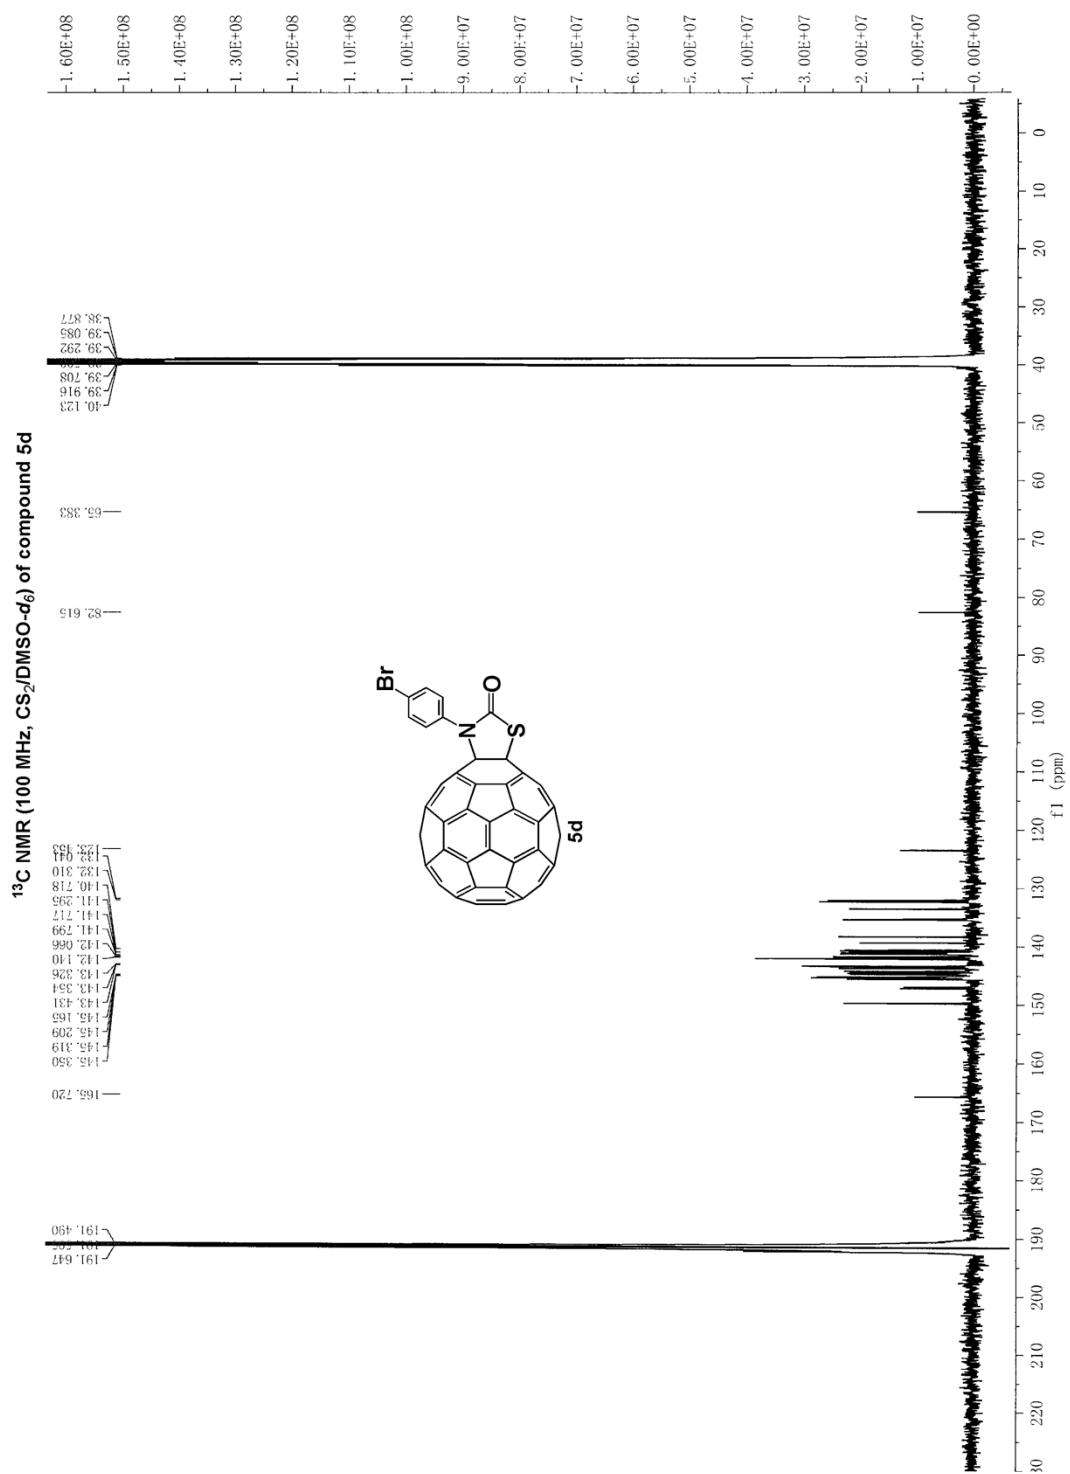

<sup>1</sup>H NMR (600 MHz, CS<sub>2</sub>/CDCl<sub>3</sub>) of compound 5e

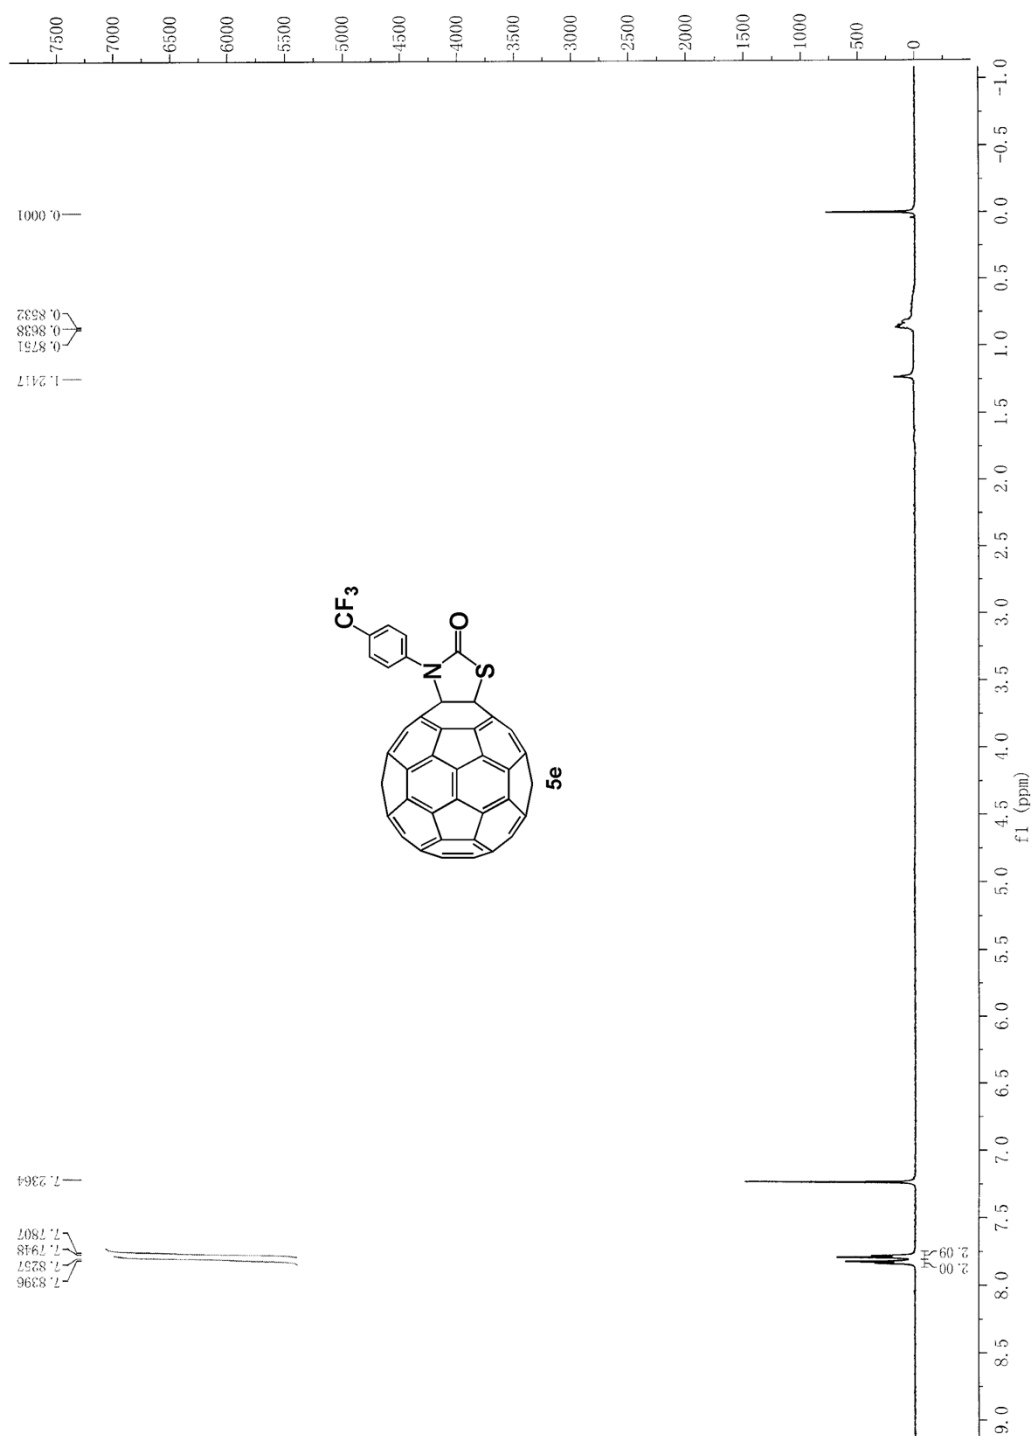

<sup>13</sup>C NMR (125 MHz, CS<sub>2</sub>/CDCl<sub>3</sub>) of compound 5e

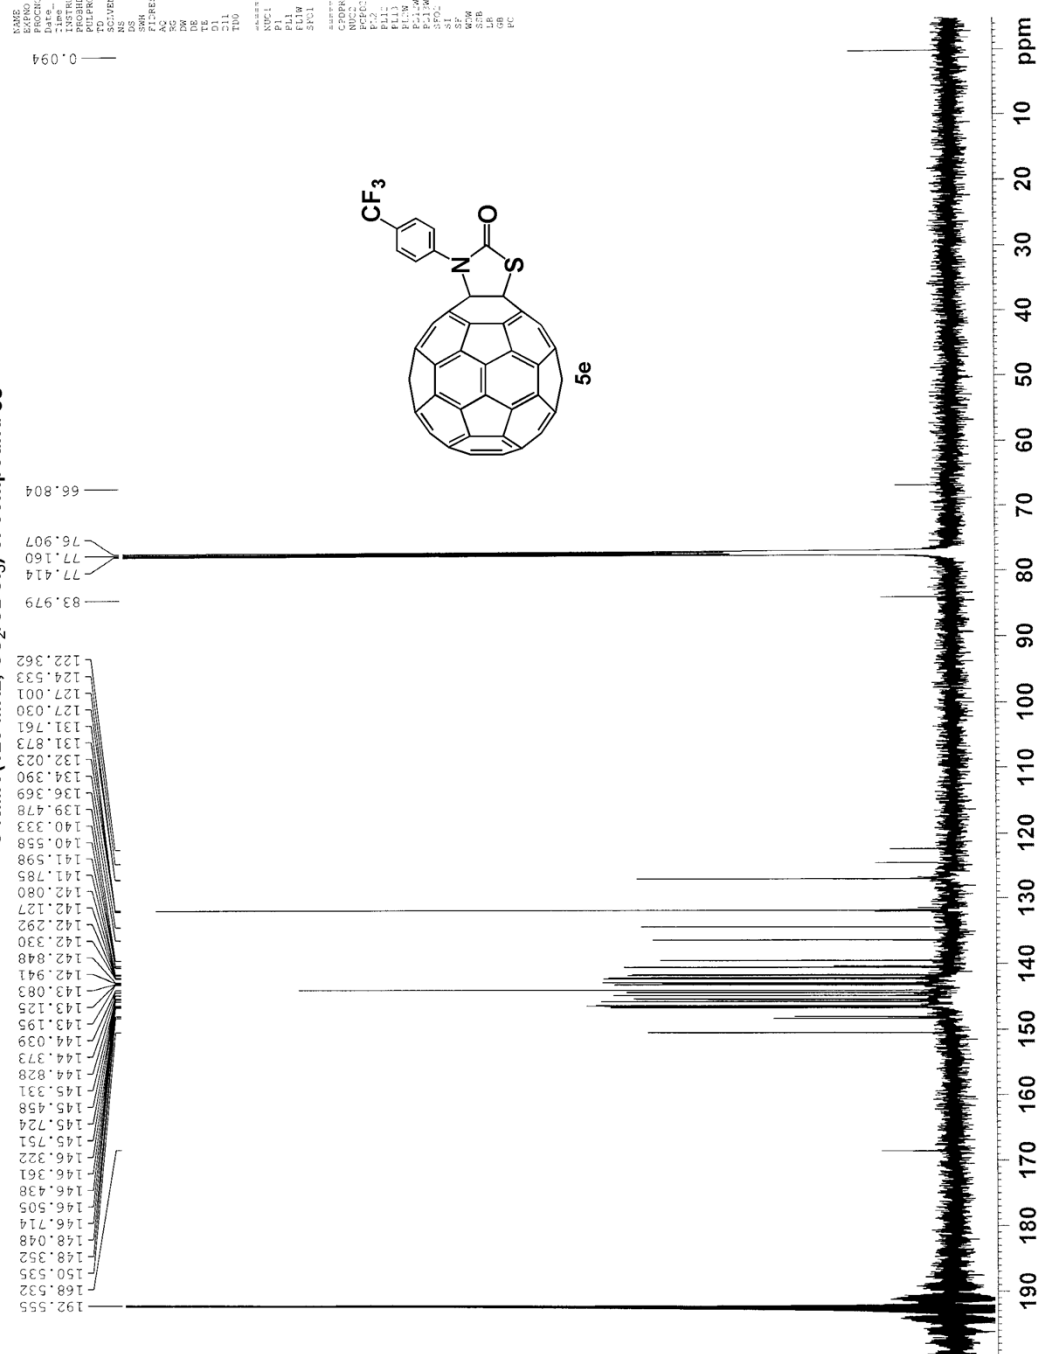

NAME: yamagita  
EXPNO: 1  
PROCNO: 1  
Date\_: 2011208  
Time: 11.00  
INSTRUM: spect  
PROBHD: 5 mm PABBO 1H/  
TD: 65536  
F2: 125.768  
SOLVENT: CDCl3  
PULPROG: zgpg30  
SFO: 125.768  
AQ: 0.556524 sec  
RG: 327.5  
RG2: 327.5  
RG3: 327.5  
DE: 16.800 uMPC  
TE: 300.2 K  
D1: 6.50 uMPC  
D2: 2.00 uMPC  
D3: 2.50000000 sec  
D4: 0.10000000 sec  
T1R1: 1.50 sec  
T1R2: 1.50 sec  
T1R3: 9.70 uMPC  
P1: 0.50 dB  
PL1: 68.467 dB  
PL12: 125.7703443 MHz  
PL13: 125.7703443 MHz  
===== CHANNEL F2 =====  
CZPRPG2: waltz16  
NUC2: 13C  
P2: 12.00 uMPC  
PC2: 17.00 dB  
PL12: 17.00 dB  
PL13: 17.00 dB  
PL14: 16.46039322 W  
PL15: 16.46039322 W  
P2+ZP: 0.41134505 W  
P2+ZP2: 0.41134505 W  
P2+ZP3: 0.41134505 W  
SFO2: 500.1320005 MHz  
SFO3: 500.1320005 MHz  
W2W: 1.57578605 MHz  
W2W2: 0  
S2B: 1.00 Hz  
S2B2: 0  
PC: 1.40

<sup>1</sup>H NMR (600 MHz, CS<sub>2</sub>/CDCl<sub>3</sub>) of compound **5f**

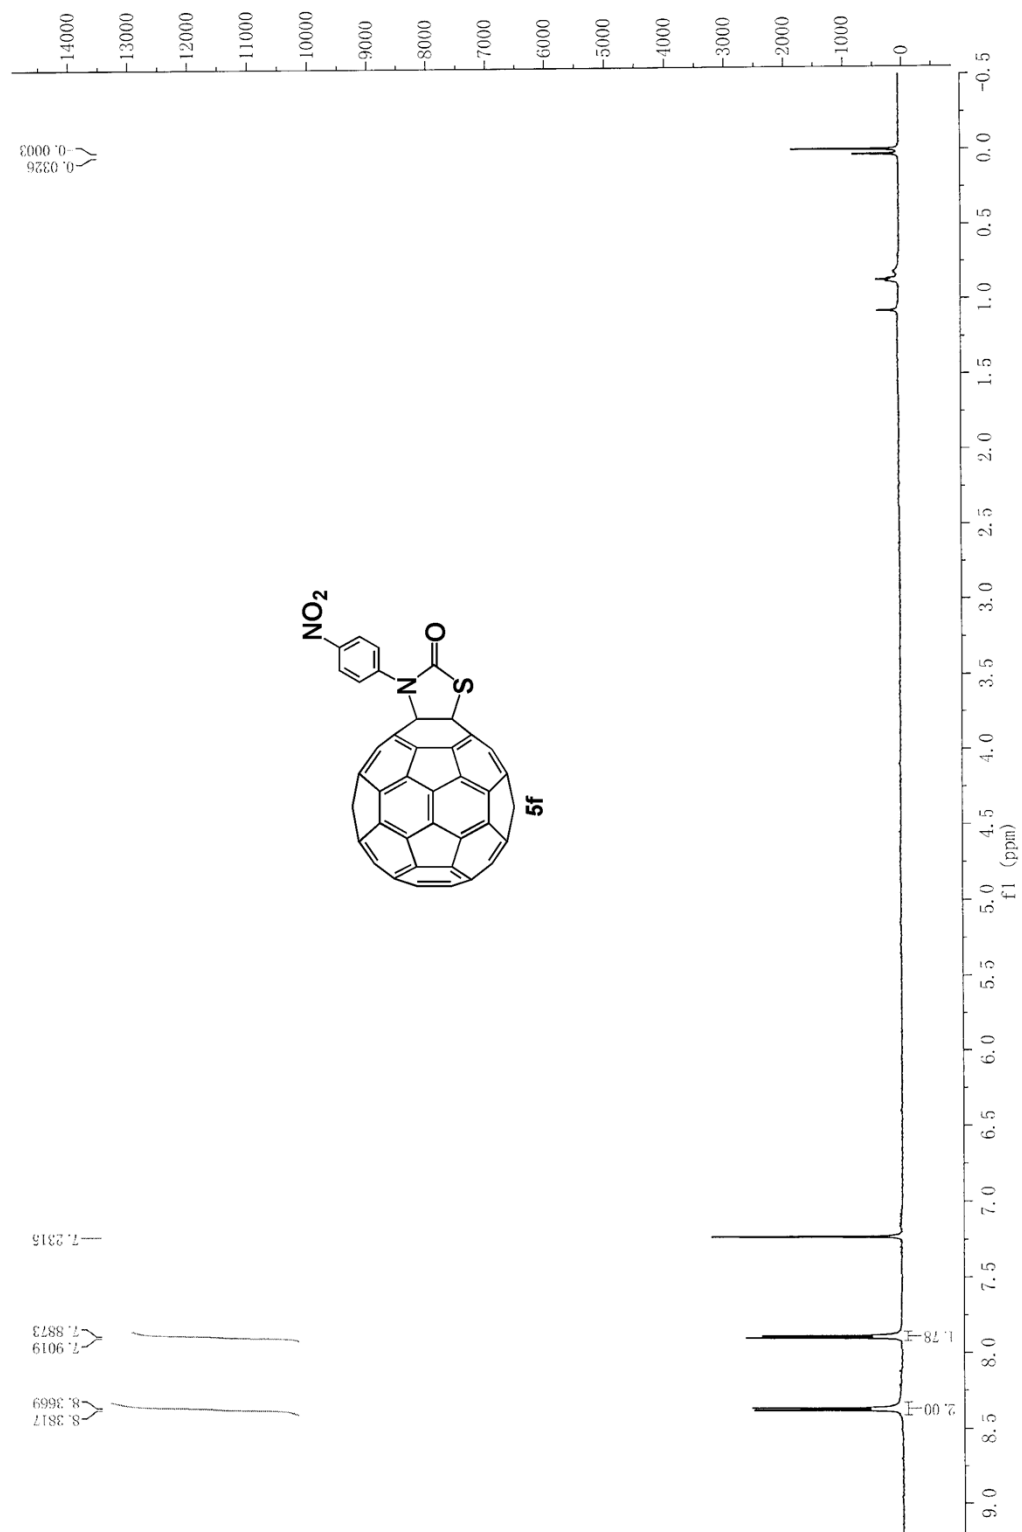



<sup>13</sup>C NMR (125 MHz, CS<sub>2</sub>/CDCl<sub>3</sub>) of compound 5f

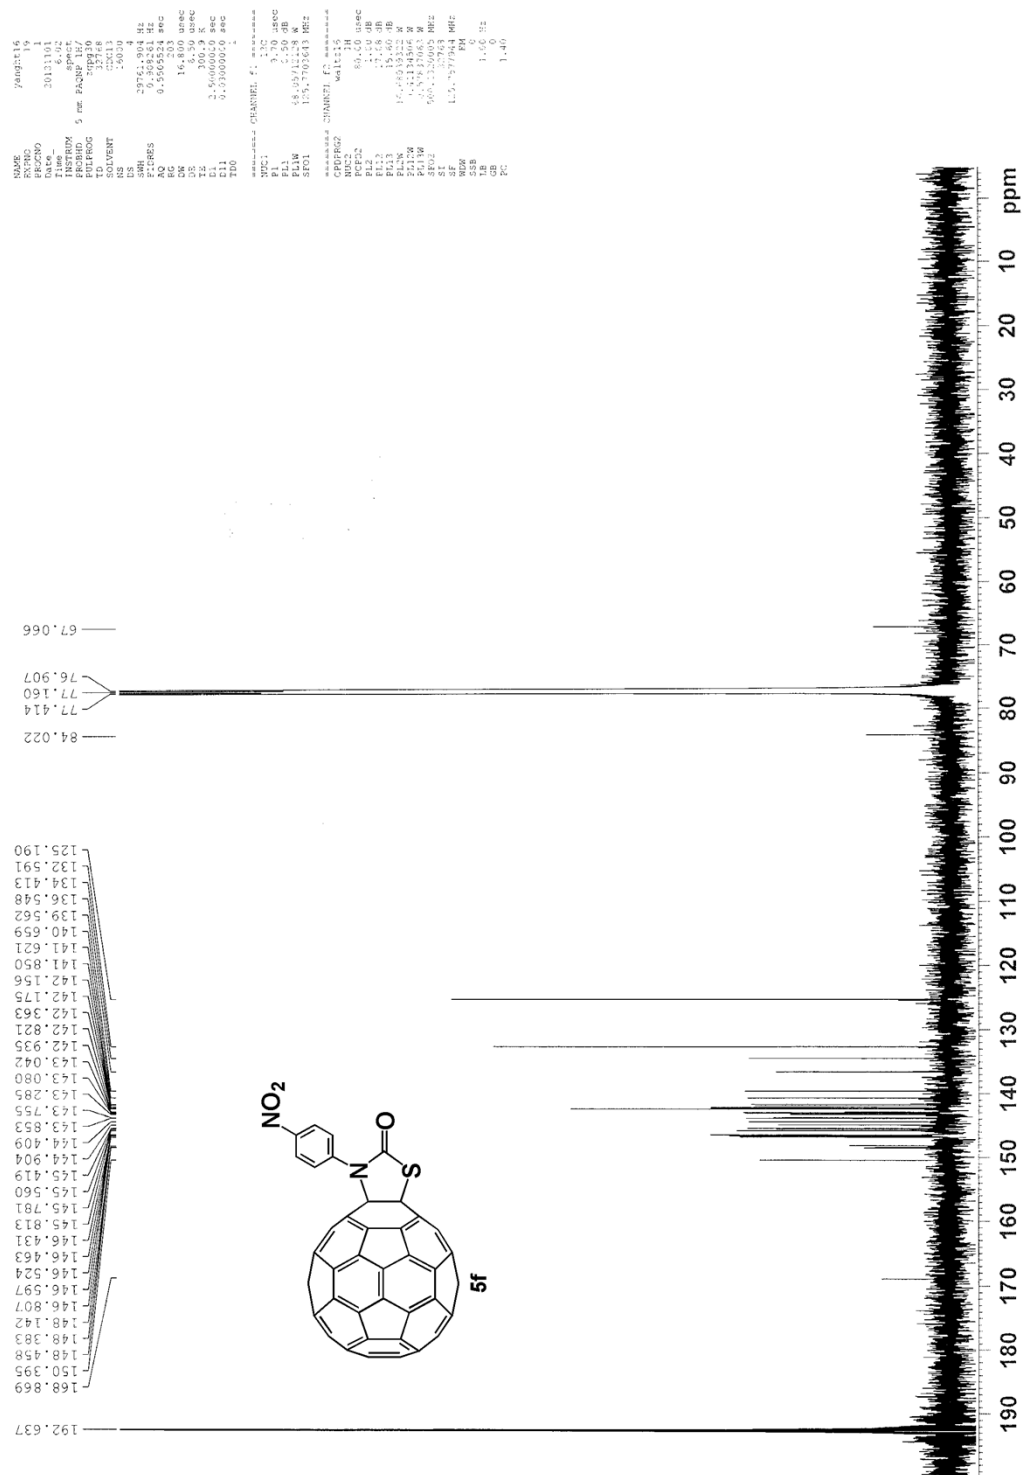

<sup>1</sup>H NMR (600 MHz, CS<sub>2</sub>/DMSO-*d*<sub>6</sub>) of compound **5g**

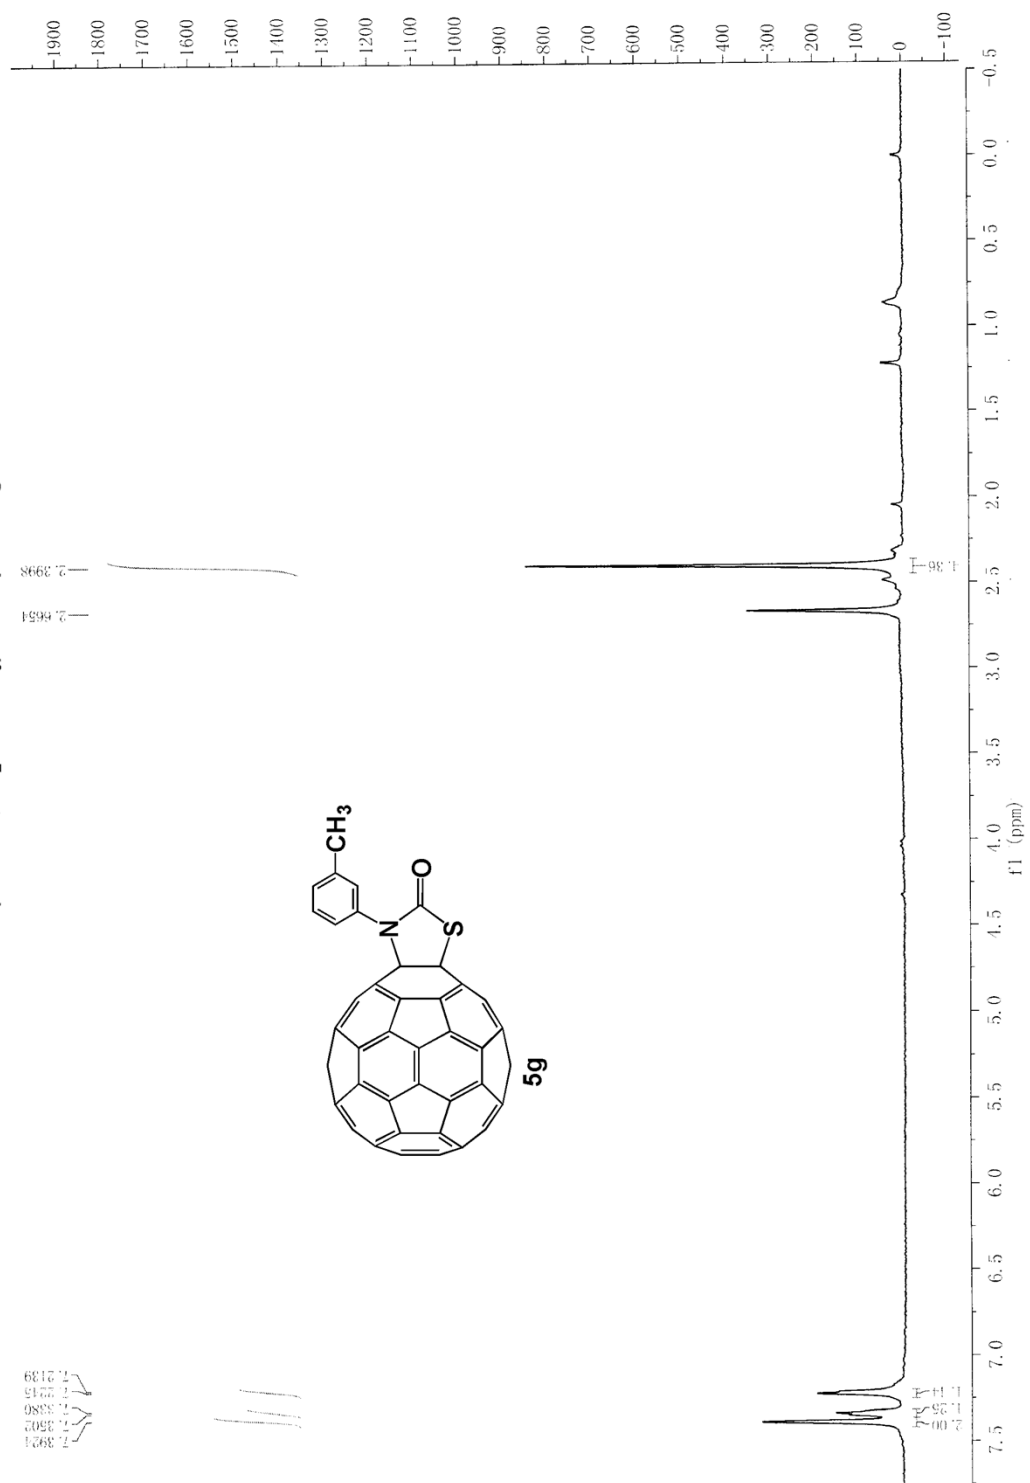

<sup>13</sup>C NMR (100 MHz, CS<sub>2</sub>/CDCl<sub>3</sub>) of compound **5g**

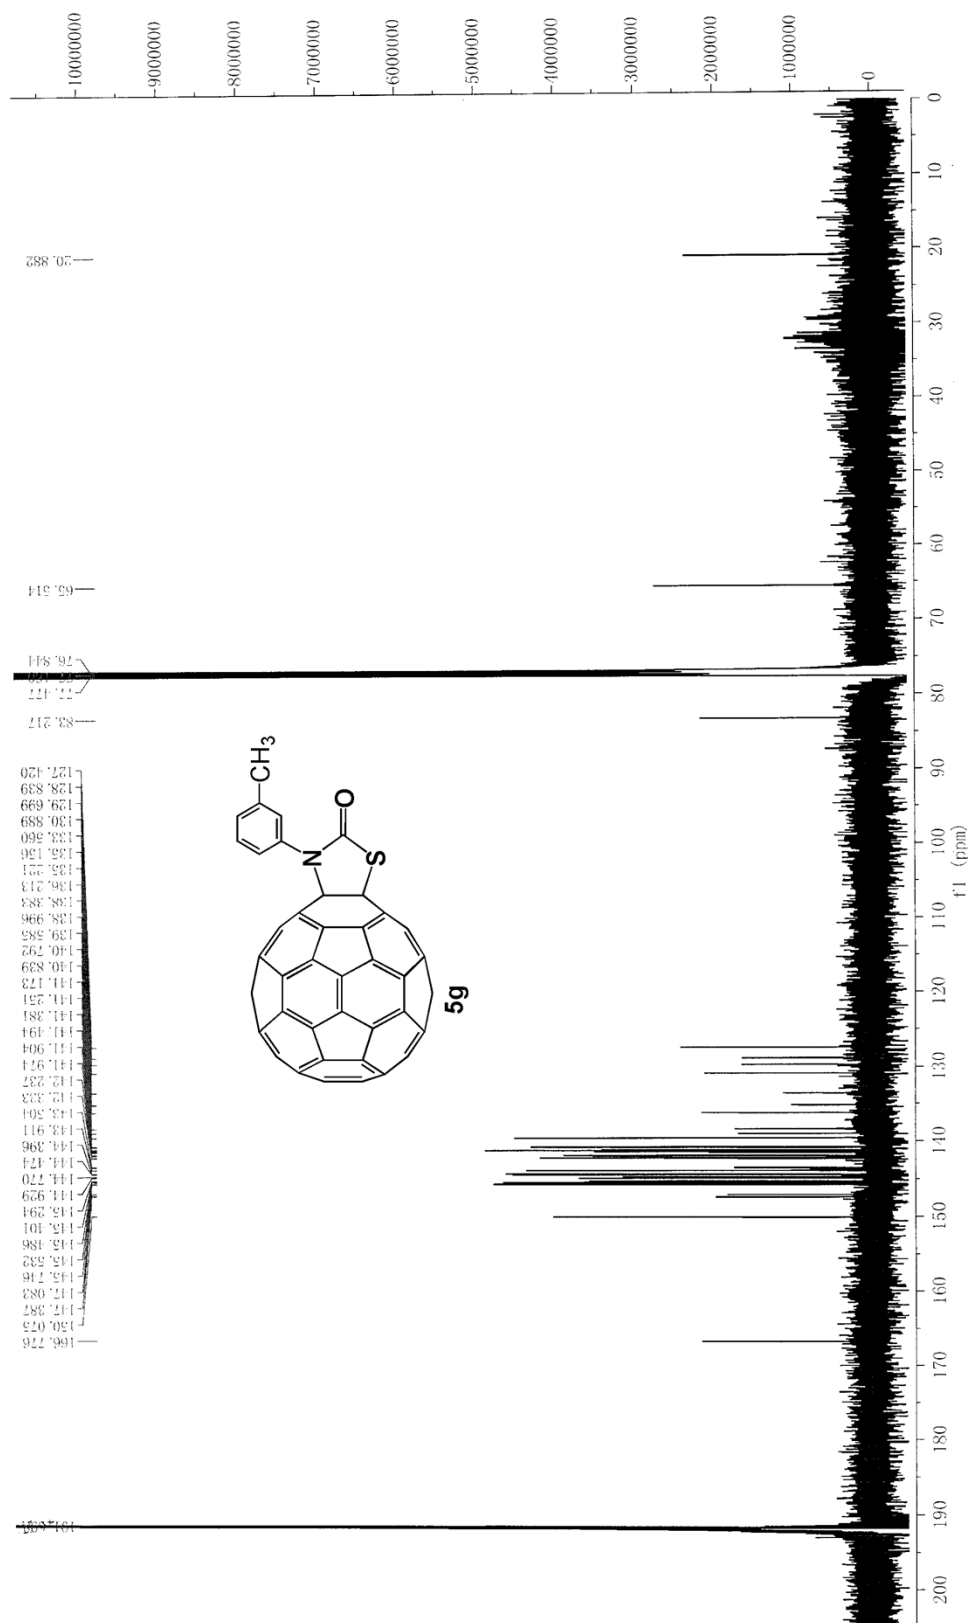

<sup>1</sup>H NMR (600 MHz, CS<sub>2</sub>/CDCl<sub>3</sub>) of compound 5h

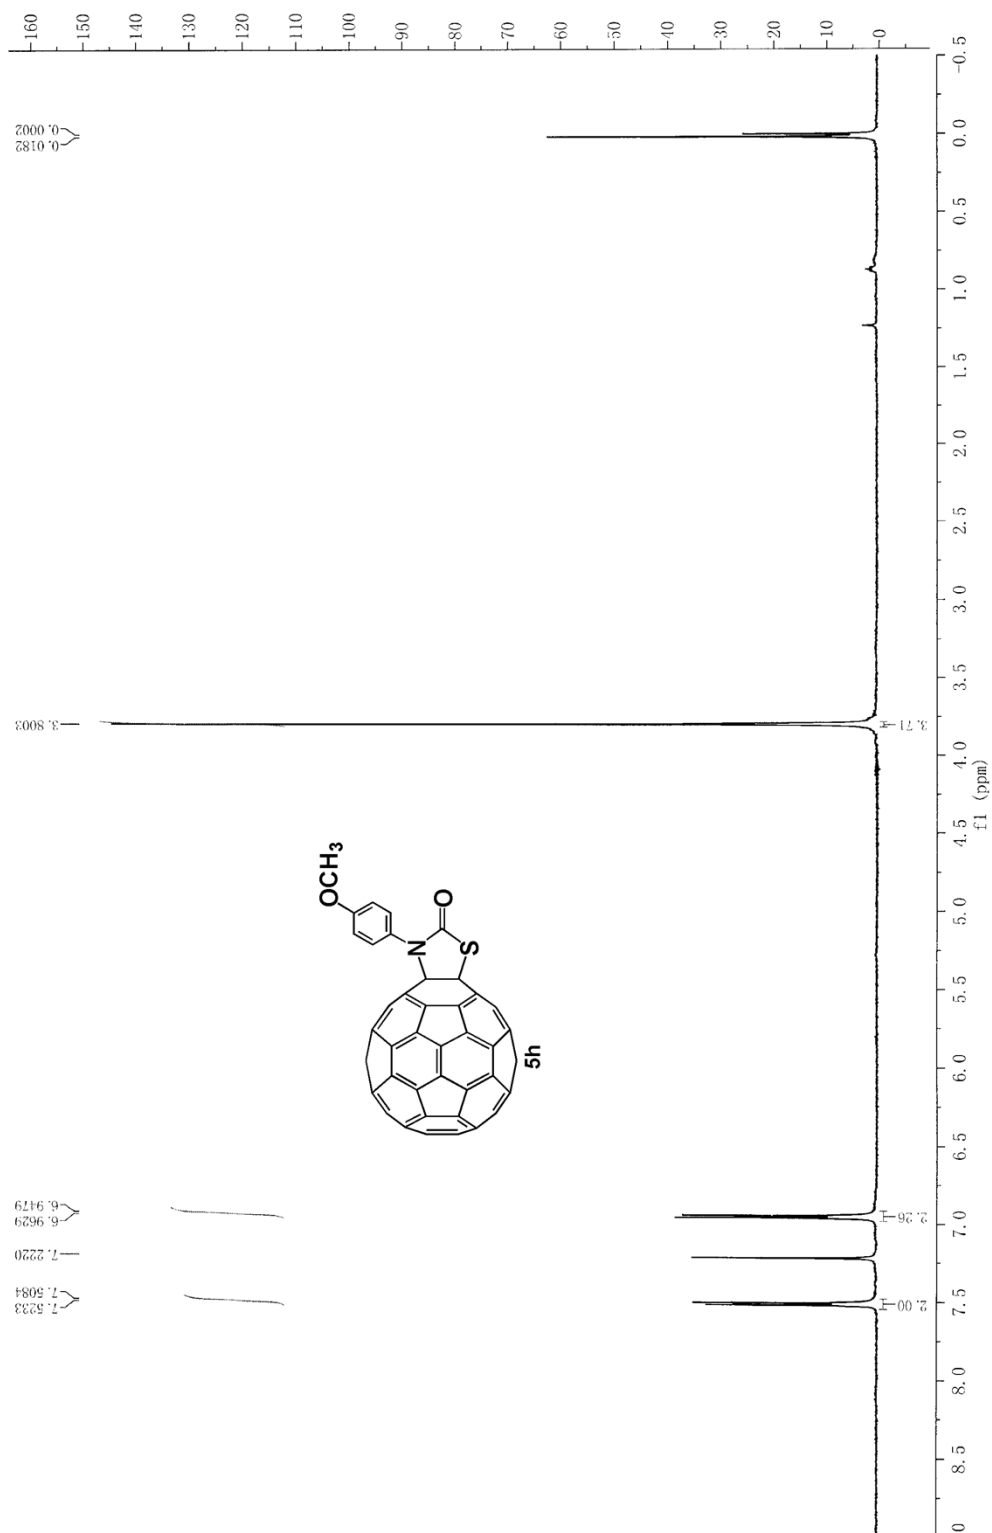

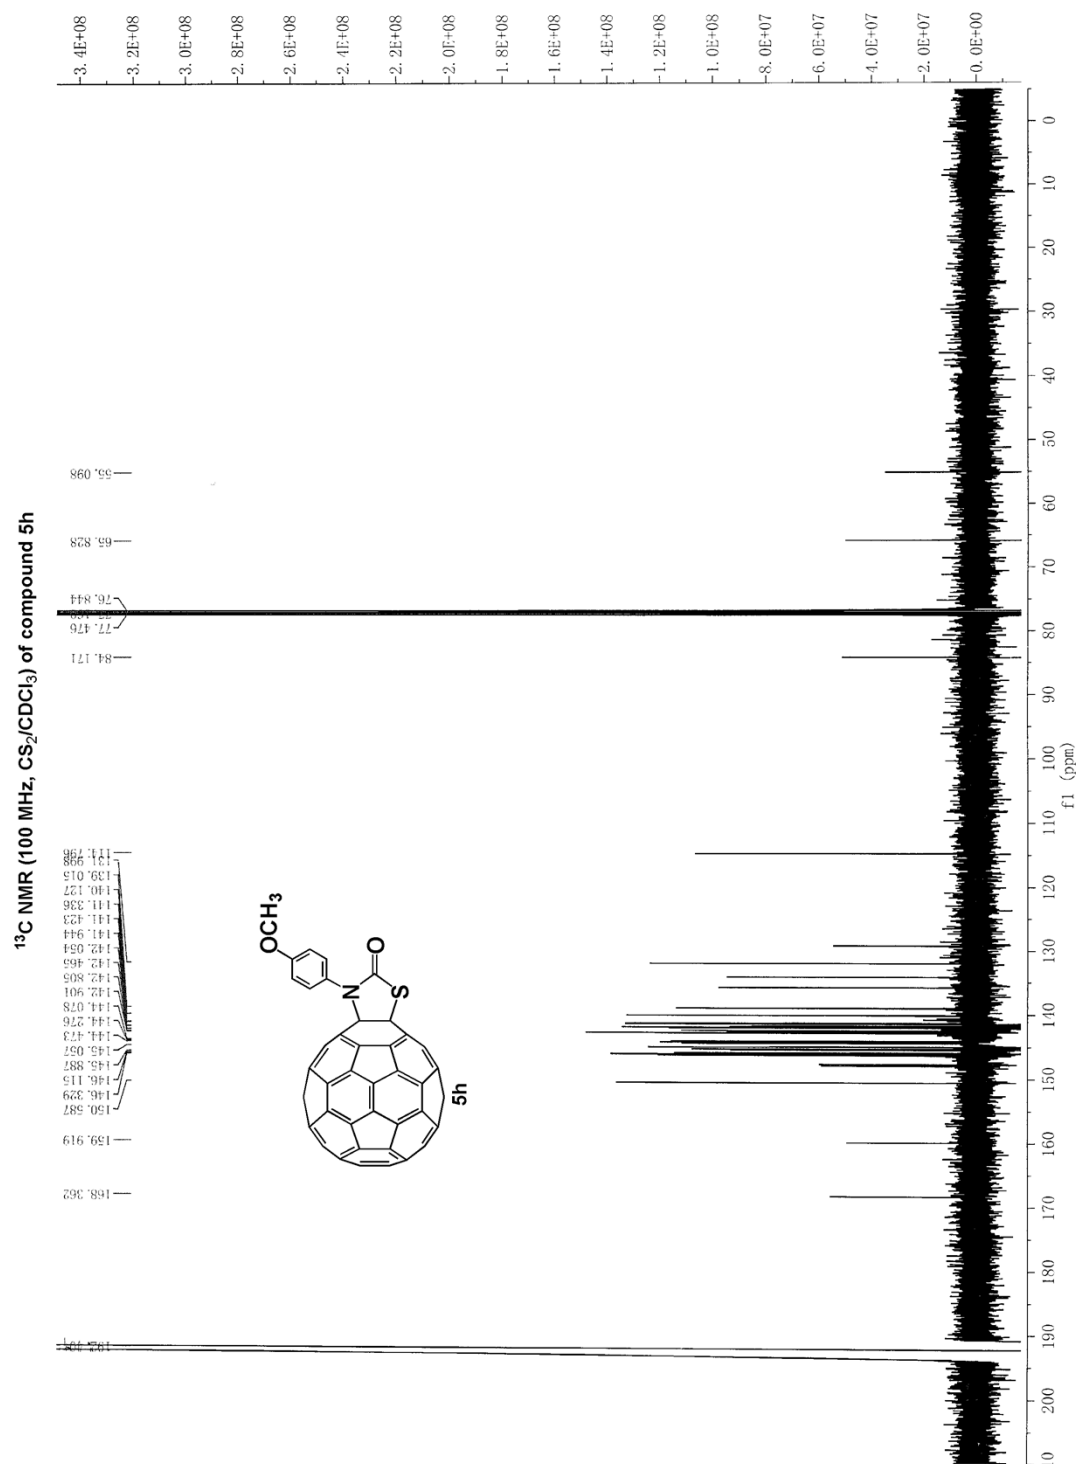

Supplement: c4ra10199e1.pdf [file c4ra10199e1.pdf]
